# Supplementary material for: PRR11 promotes ccRCC tumorigenesis by regulating E2F1 stability
Source: PubMed Central journal article supplement (PMC8525590; doi:10.1172/jci.insight.145172), 2021-10-08

## Supplementary Information

### Supplementary Figures

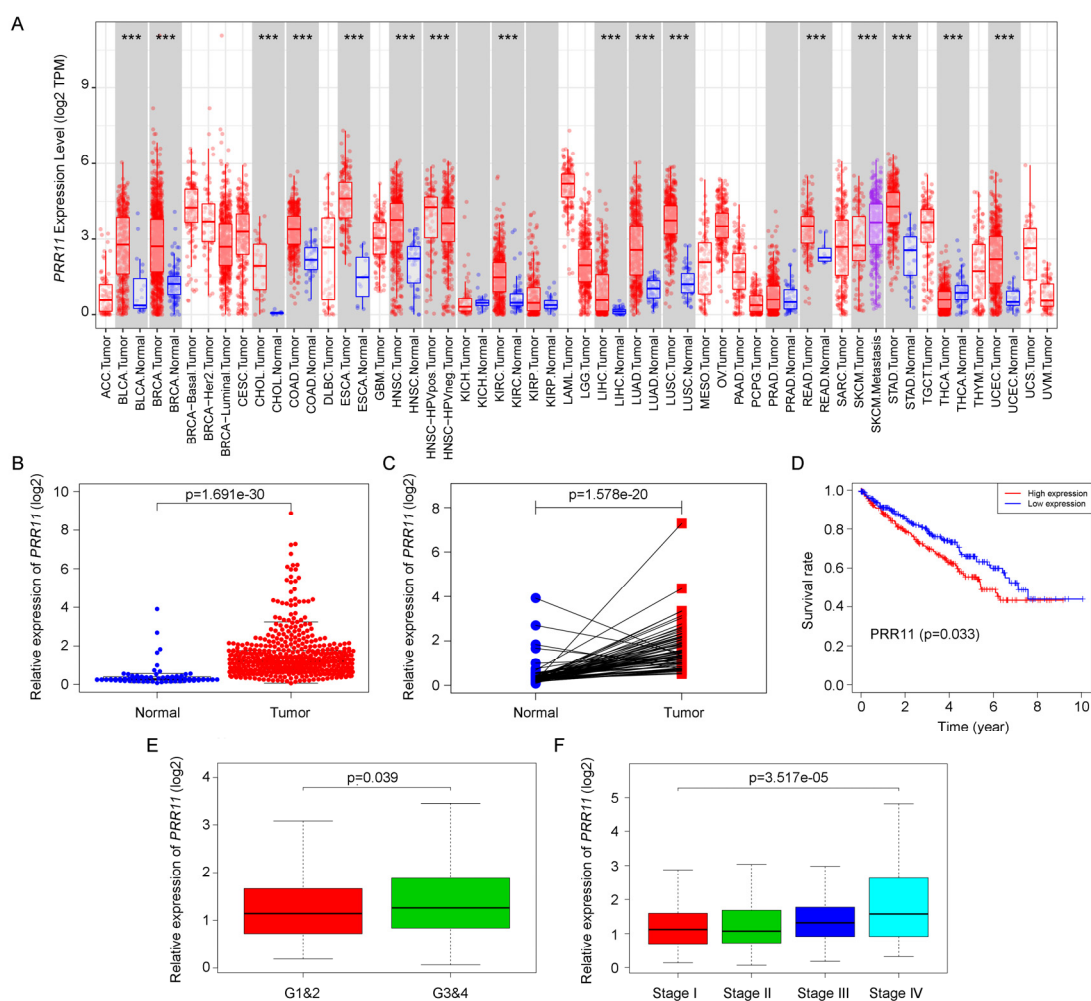

**Supplementary Figure S1. Bioinformatics analyses of *PRR11* expression in TCGA.** (A) *PRR11* expression in different tumor types in the TIMER database. (B) In TCGA database, *PRR11* mRNA was overexpressed in unpaired ccRCC samples ( $n = 72$  for normal samples and  $n = 539$  for tumor samples). (C) In TCGA database, *PRR11* mRNA was overexpressed in ccRCC paired samples ( $n = 72$ ). (D) Kaplan-Meier survival analysis of ccRCC patients based on TCGA database. (E-F) *PRR11* expression was positively correlated with tumor grade ( $n = 243$  for G1&2 and  $n = 279$  for G3&4) and tumor stage ( $n = 265$  for Stage I,  $n = 57$  for Stage II,  $n = 123$  for Stage III and  $n = 82$  for Stage IV) in ccRCC tissues. The microarray data of TCGA dataset were normalized using the “limma” R package. The data are shown as the mean  $\pm$  SD. Two-tailed *t*-test (A-C, E) and one-way ANOVA (F) test analyses were performed.

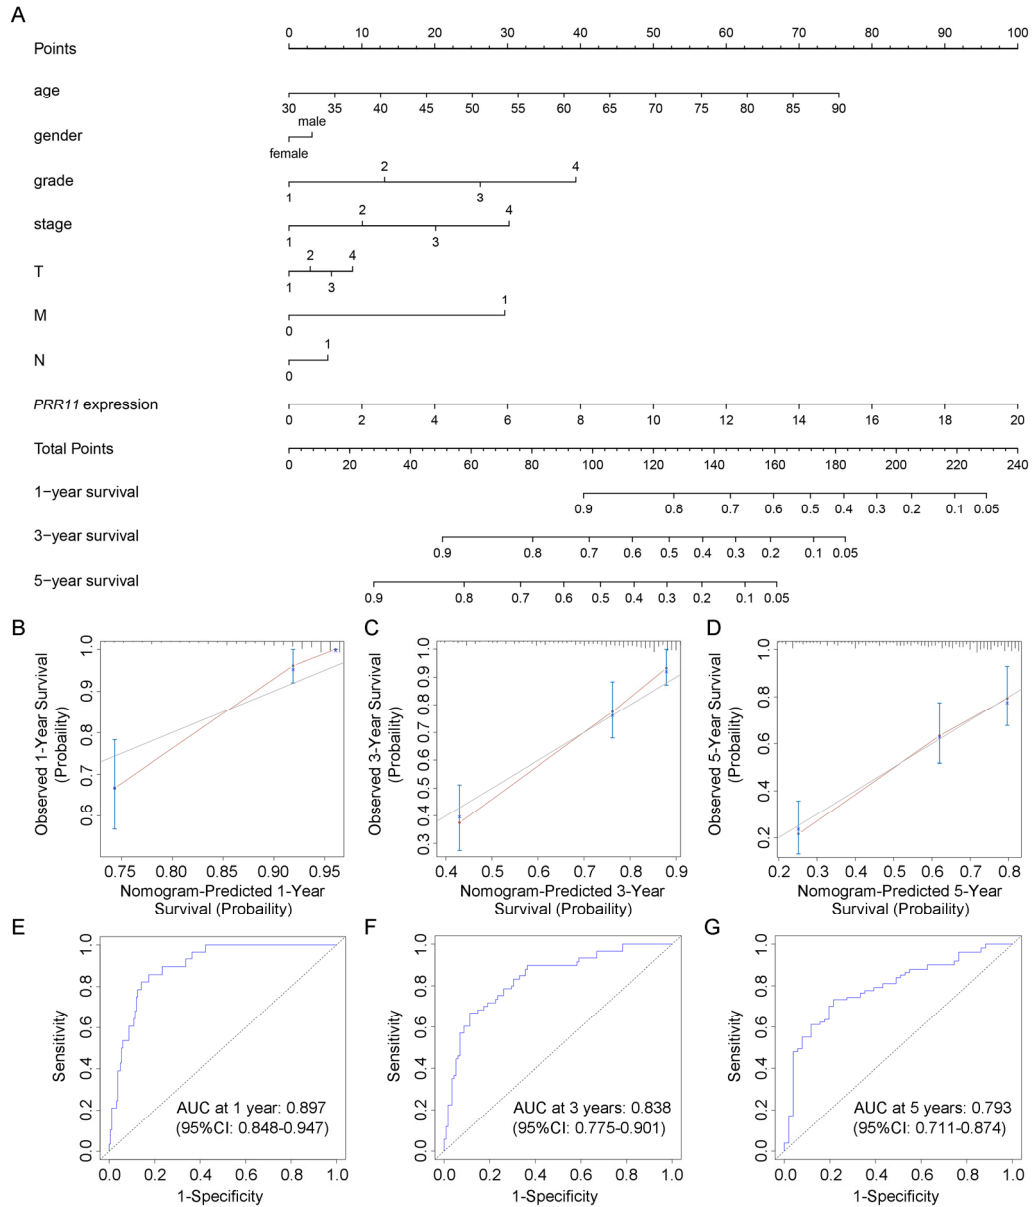

**Supplementary Figure S2. Predictive nomogram and calibration curves based on TCGA database. (A)** The nomogram for predicting 1-, 3-, and 5-year survival in ccRCC patients. **(B-D)** Generation of the nomogram's 1-, 3-, and 5-year calibration curves. **(E-G)** Generation of the nomogram's 1-, 3-, and 5-year ROC curves.

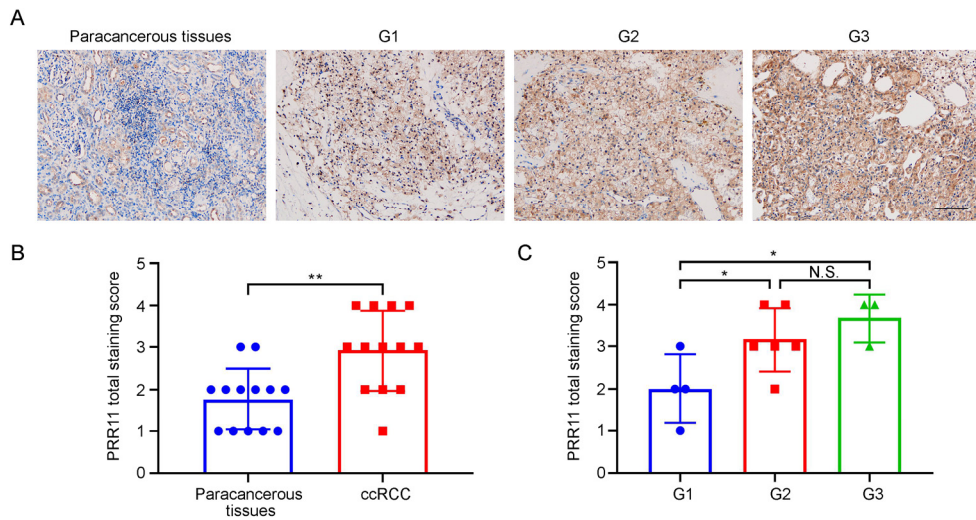

**Supplementary Figure S3. IHC staining of samples from our hospital to detect PRR11 expression.** (A-C) IHC staining indicated that the expression of PRR11 in ccRCC tissues was significantly higher than that in normal kidney tissues ( $n = 13$ ), while the expression of PRR11 was higher in tumors of lower grades ( $n = 4$  for G1,  $n = 6$  for G2 and  $n = 3$  for G3). Scale bar:  $200 \mu\text{m}$ . The data are shown as the mean  $\pm$  SD. Two-tailed  $t$ -test (B) and one-way ANOVA test (C) analyses were performed. N.S. = No significance, \*  $p < 0.05$ , \*\*  $p < 0.01$ .

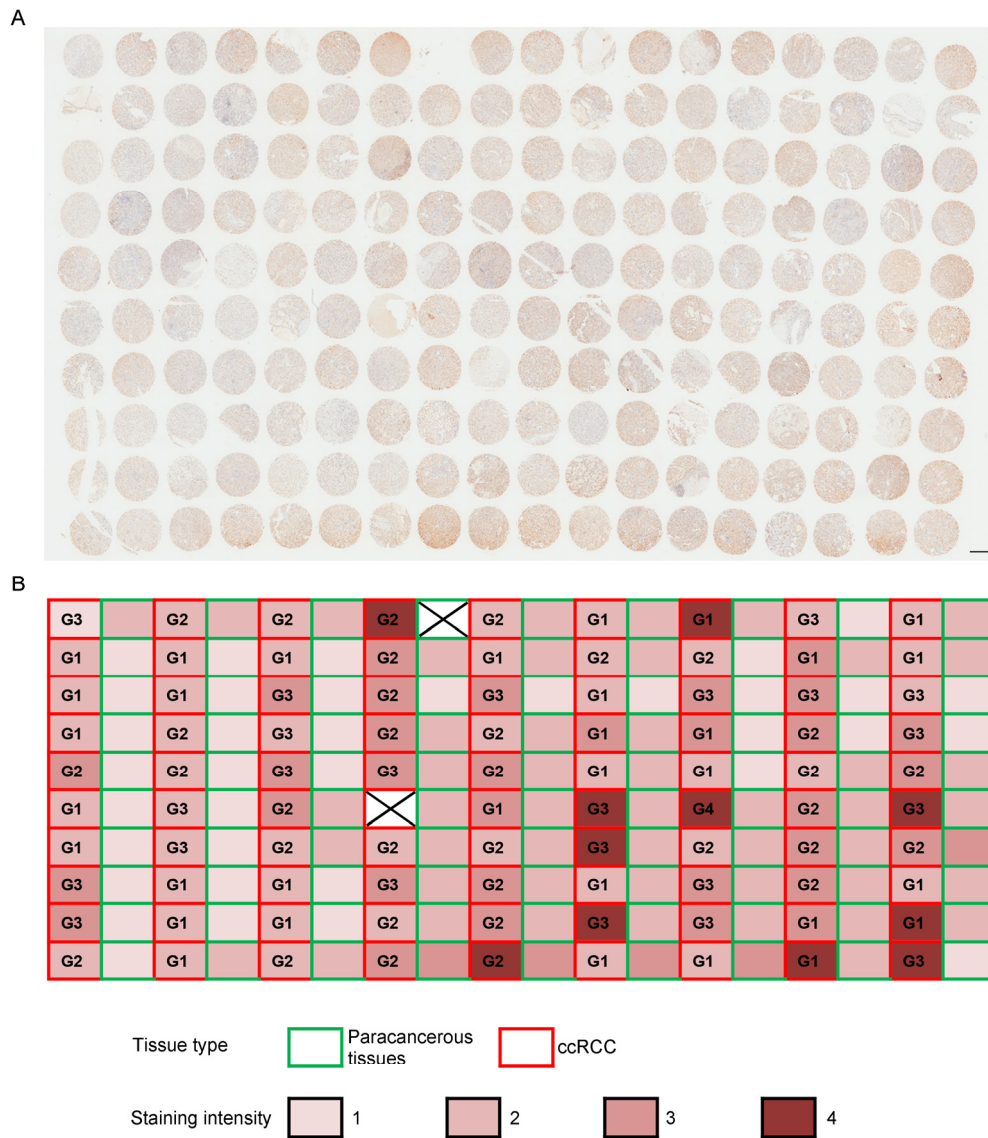

**Supplementary Figure S4. Clinical information about the tissue microarray. (A)** Overview of tissues microarray. Scale bar: 800  $\mu$ m. **(B)** Pathological grade, tissue type and staining intensity of the tissue microarray.

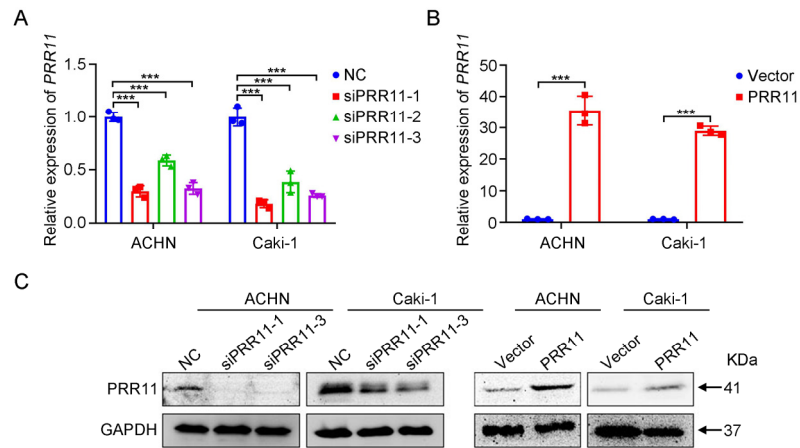

**Supplementary Figure S5. The efficiency of *PRR11* knockdown and overexpression in ACHN and Caki-1 cells was verified. (A-C) qRT-PCR and Western blotting assays confirmed the efficiency of *PRR11* silencing and upregulation in ccRCC cells (ACHN and Caki-1 cells) (n = 3). The data are shown as the mean  $\pm$  SD. One-way ANOVA test (A) and two-tailed *t*-test (B) analyses were performed. \*\*\*  $p < 0.001$ .**

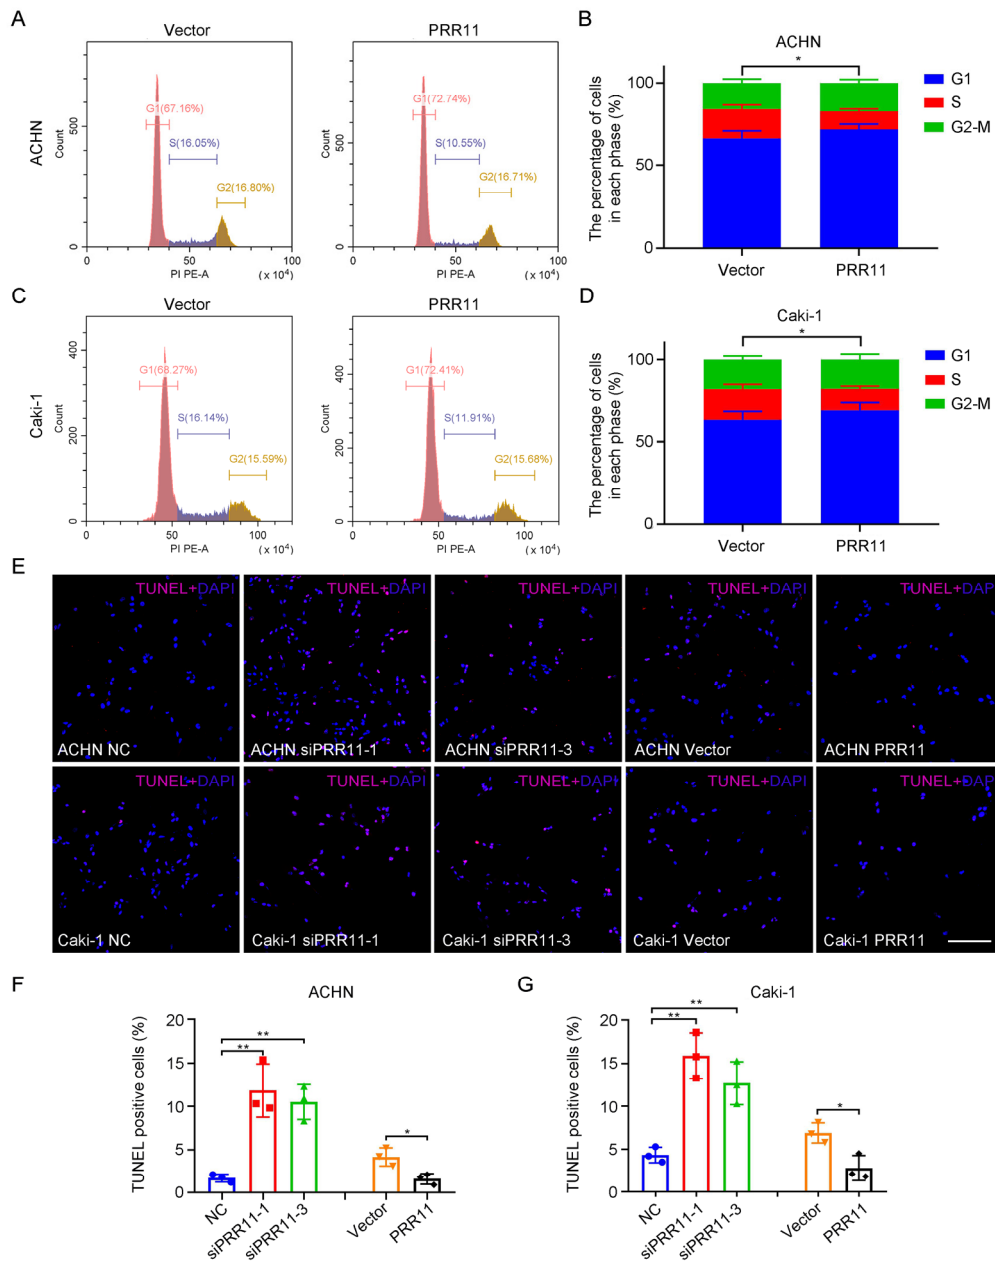

**Supplementary Figure S6. The effect of PRR11 expression on ccRCC cells was evaluated by flow cytometry and TUNEL assay. (A-D)** Flow cytometry analysis of the effect of PRR11 overexpression on the cell cycle progression of ccRCC (n = 3). **(E-G)** The TUNEL assay was used to evaluate the effect of PRR11 expression on ccRCC cell apoptosis (n = 3). Scale bar: 100  $\mu$ m. The data are shown as the mean  $\pm$  SD. Two-tailed *t*-test analyses (**B, D, F right, G right**) and one-way ANOVA test (**F left, G left**) analyses were performed. \*  $p < 0.05$ , \*\*  $p < 0.01$ .

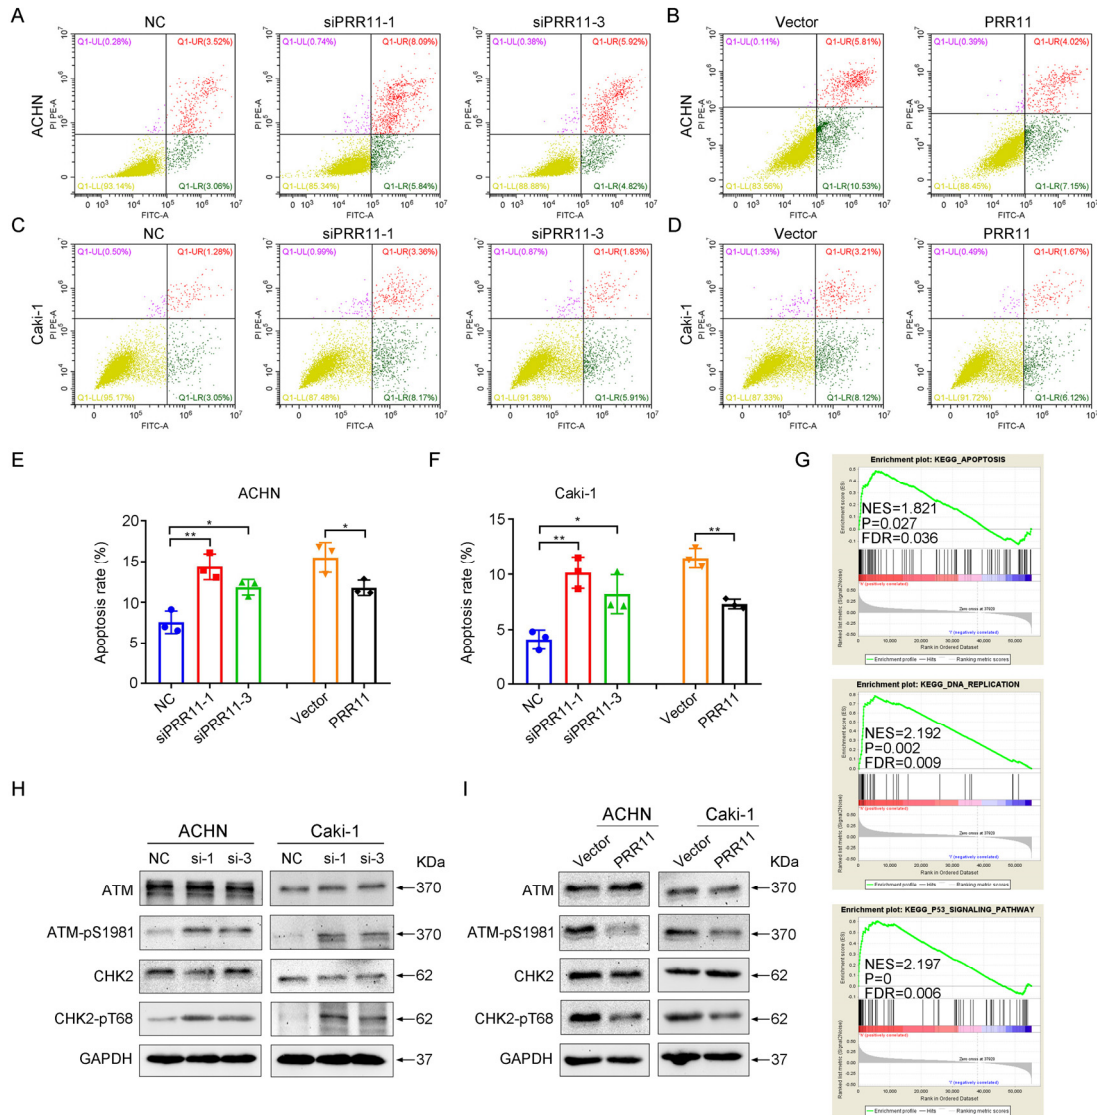

**Supplementary Figure S7. The effect of PRR11 on the apoptosis of ccRCC cells was analyzed by flow cytometry. (A-F)** *PRR11* silencing led to an increase in the percentage of apoptotic ccRCC cells, while overexpression of PRR11 led to a decrease in apoptosis ( $n = 3$ ). **(G)** GSEA revealed the correlation between increased PRR11 expression and apoptosis, DNA replication and the p53 signaling pathway. NES, normalized enrichment score. Nominal p values calculated by the permutation test and FDR-corrected q values were obtained by multiple hypothesis tests in GSEA. **(H-I)** Expression of ATM/CHK2 pathway-related proteins was detected in *PRR11*-silenced or PRR11-overexpressing ccRCC cells by Western blotting analysis ( $n = 3$ ). The data are shown as the mean  $\pm$  SD. One-way ANOVA test (**E left, F left**) and two-tailed *t*-test (**E right, F right**) analyses were performed. \*  $p < 0.05$ , \*\*  $p < 0.01$ .

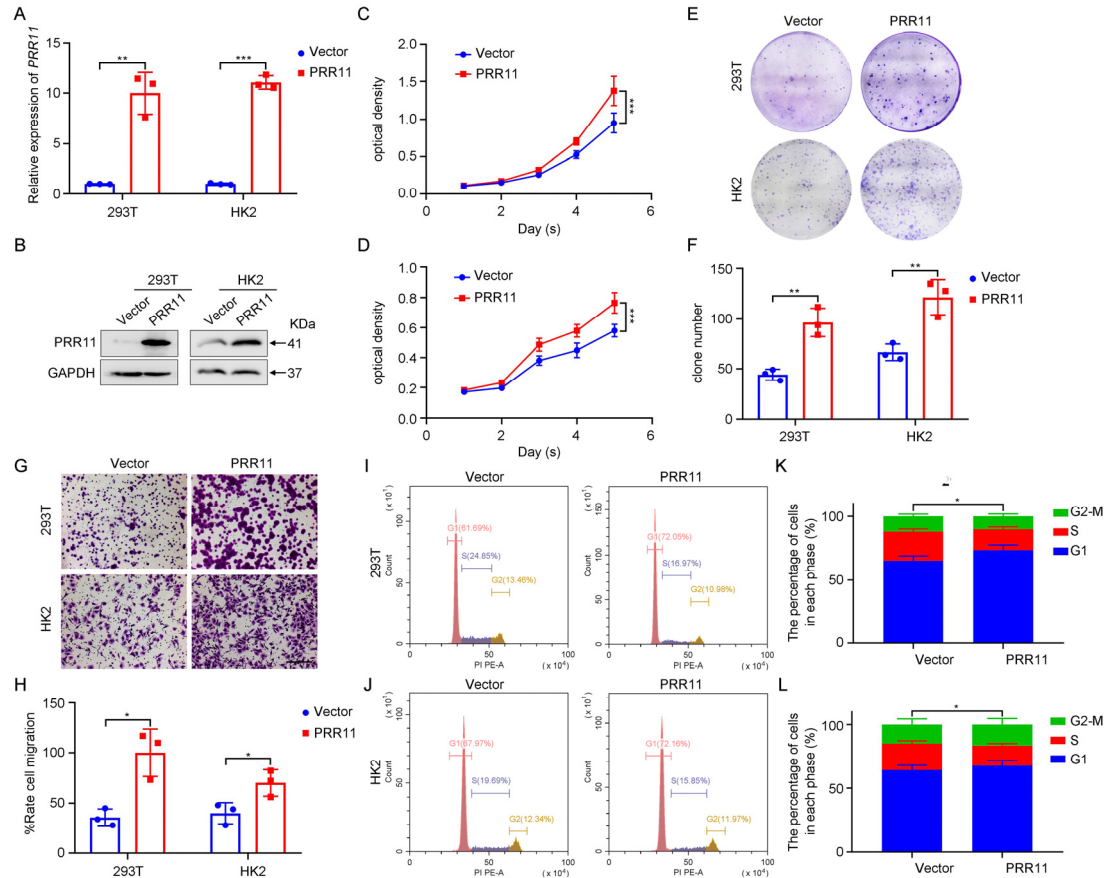

**Supplementary Figure S8. The overexpression of PRR11 promoted the proliferation and migration of nonmalignant renal cells in vitro. (A-B)** The overexpression efficiency of LV-PRR11 in 293T cells and HK2 cells was verified at the transcriptional and translational levels ( $n = 3$ ). **(C-D)** MTT assay was used to evaluate the proliferation of 293T cells and HK2 cells overexpressing PRR11 ( $n = 3$ ). **(E-F)** A clonogenic assay was used to assess the colony formation ability of PRR11-overexpressing 293T cells and HK2 cells, and the clone numbers were statistically analyzed ( $n = 3$ ). **(G-H)** A Transwell migration assay was used to evaluate the migration ability of PRR11-overexpressing 293T cells and HK2 cells, and the relative number of migrated cells was statistically analyzed ( $n = 3$ ). Scale bar: 150  $\mu\text{m}$ . **(I-L)** Flow cytometry analysis of the effect of PRR11 overexpression on the cell cycle progression of 293T cells and HK2 cells ( $n = 3$ ). The data are shown as the mean  $\pm$  SD. Two-tailed  $t$ -test analyses were performed. \*  $p < 0.05$ , \*\*  $p < 0.01$ , \*\*\*  $p < 0.001$ .



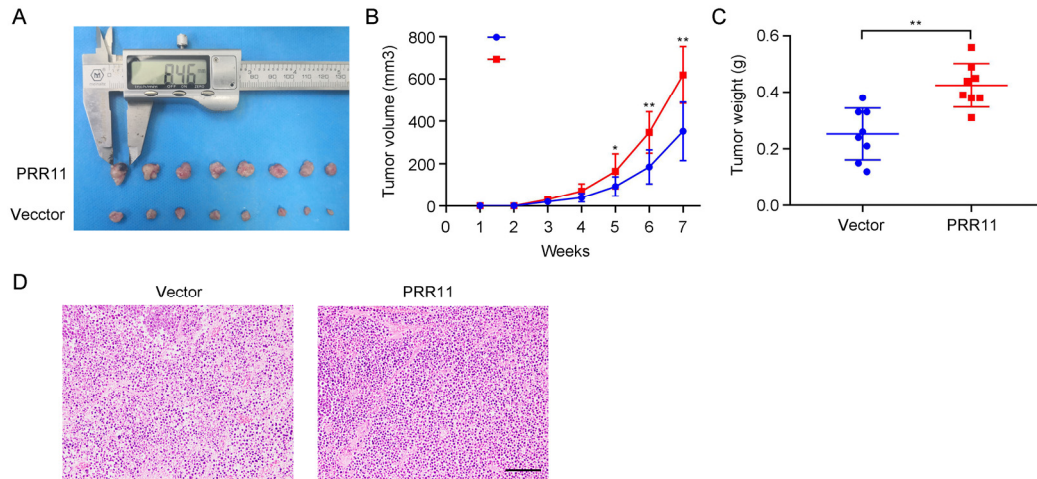

**Supplementary Figure S9. PRR11 promoted tumorigenesis in vivo.** (A) LV-Vector and LV-PRR11 293T cells were subcutaneously injected into nude mice to establish xenograft models. After 7 weeks, the xenografts were removed and imaged ( $n = 8$ ). (B-C) Analysis and evaluation of the xenograft volumes and weights of LV-Vector group (blue dots) and LV-PRR11 group (red squares). (D) HE staining was used to determine the degree of tumor malignancy. Scale bar: 200  $\mu\text{m}$ . The data are shown as the mean  $\pm$  SD. Two-tailed  $t$ -test analyses were performed. \*  $p < 0.05$ , \*\*  $p < 0.01$ .

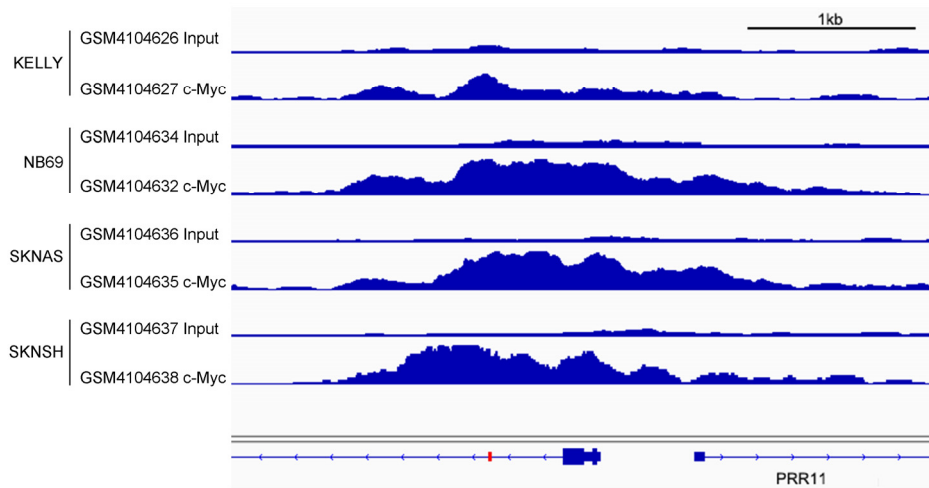

**Supplementary Figure S10. Browser view of the highly conserved ChIP-Seq peak on PRR11.** The binding of c-Myc to the PRR11 promoter region was confirmed by c-Myc ChIP-Seq data from the GSE138295 dataset in the GEO public database.

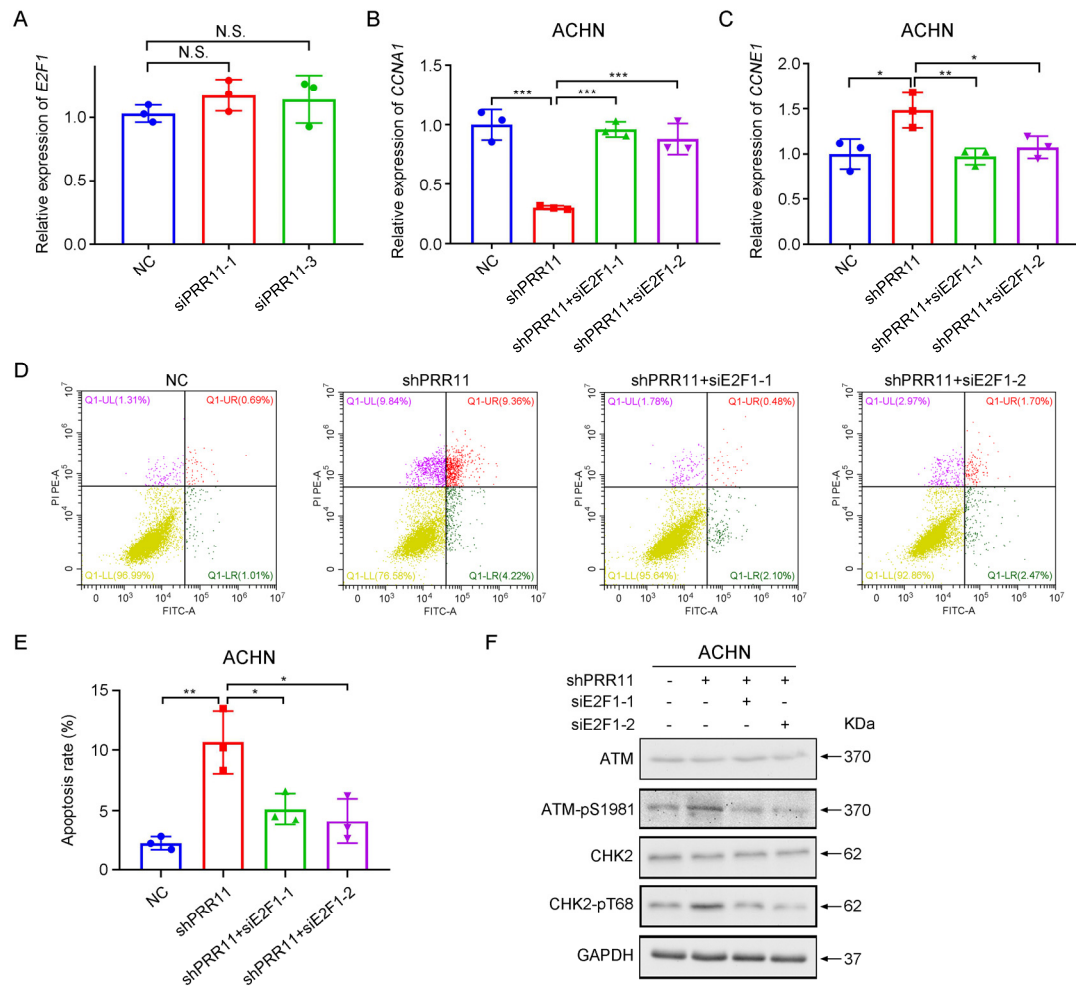

**Supplementary Figure S11. Expression of related genes and downregulation of *E2F1* expression reversed the shPRR11-mediated promotion of apoptosis in ACHN cells.** (A) qRT-PCR analysis of the effect of *PRR11* silencing on the mRNA expression of *E2F1* in ACHN cells (n = 3). (B-C) qRT-PCR analysis of the effects on *CCNA1* and *CCNE1* mRNA expression in rescue experiments with siE2F1 (n = 3). (D-E) Flow cytometry analysis showed that *E2F1* knockdown could significantly reverse the apoptotic effect of shPRR11 transfection in ACHN cells (n = 3). (F) The expression of apoptosis-related genes in ccRCC cells was detected by western blotting (n = 3). The data are shown as the mean  $\pm$  SD. One-way ANOVA test (A) and two-way ANOVA test (B-C, E) analyses were performed. N.S. = No significance, \*  $p < 0.05$ , \*\*  $p < 0.01$ , \*\*\*  $p < 0.001$ .

**Supplementary Table S1. Cox analysis of 248 ccRCC patients based on TCGA database.**

| <b>Kidney cancer</b><br><b>patients (n=248)</b> | Univariate analysis |             |                | Multivariate analysis |             |                |
|-------------------------------------------------|---------------------|-------------|----------------|-----------------------|-------------|----------------|
|                                                 | HR                  | 95%CI       | <i>P</i> value | HR                    | 95%CI       | <i>P</i> value |
| <b><i>PRRI1</i> expression (high/low)</b>       | 2.081               | 1.521-2.846 | <0.001         | 1.532                 | 1.053-2.229 | 0.002          |
| <b>Age</b>                                      | 1.023               | 1.005-1.041 | 0.012          | 1.032                 | 1.012-1.053 | 0.717          |
| <b>Gender (male/female)</b>                     | 1.013               | 0.666-1.541 | 0.951          | 1.088                 | 0.688-1.722 | 0.066          |
| <b>Grade (G2-G4 VS. G1)</b>                     | 2.242               | 1.682-2.988 | <0.001         | 1.376                 | 0.980-1.934 | 0.375          |
| <b>Stage (S2-S4 VS. S1)</b>                     | 1.862               | 1.541-2.251 | <0.001         | 1.267                 | 0.751-2.139 | 0.736          |
| <b>T Stage (T2-T4 VS. T1)</b>                   | 1.943               | 1.538-2.456 | <0.001         | 1.088                 | 0.666-1.776 | 0.079          |
| <b>M Stage (M1 VS. M0)</b>                      | 4.073               | 2.634-6.300 | <0.001         | 2.073                 | 0.919-4.677 | 0.542          |
| <b>N Stage (N1 VS. N0)</b>                      | 2.932               | 1.521-2.846 | 0.001          | 1.262                 | 0.598-2.663 | 0.026          |

**Supplementary Table S2. List of primers for qRT-PCR.**

| <b>Gene name</b> | <b>Forward primer (5'-3')</b> | <b>Reverse primer (5'-3')</b> |
|------------------|-------------------------------|-------------------------------|
| PRR11            | AAAGATGGACCCATGCAGATAAC       | TGCTTTCGGCGATGGTATAAG         |
| GAPDH            | TGCACCACCAACTGCTTAG           | GATGCAGGGATGATGTTC            |
| c-Myc            | CGTCCTCGGATTCTCTGCTC          | GATTCTTCCTCATCTTCTTGTC        |
| CCNA1            | GAGGTCCCGATGCTTGTGAG          | GTTAGCAGCCCTAGCACTGTC         |
| CCNE1            | AAGGAGCGGGACACCATGA           | ACGGTCACGTTTGCCTTCC           |
| VHL              | GCAGGCGTCGAAGAGTACG           | CGGACTGCGATTGCAGAAGA          |

**Supplementary Table S3. List of antibodies.**

| Antigens                  | Species antibodies raised in | Dilution                    | Supplier                                            |
|---------------------------|------------------------------|-----------------------------|-----------------------------------------------------|
| PRR11                     | Rabbit, polyclonal           | 1:1,000 (WB)<br>1:100 (IHC) | Cusabio, Cat. #PA836225LA01HU                       |
| GAPDH                     | Mouse, monoclonal            | 1:2,000 (WB)                | Santa Cruz Biotechnology Inc., USA, Cat. #sc-365062 |
| E2F1                      | Rabbit, monoclonal           | 1:1,000 (WB)<br>1:50 (IP)   | Abcam, UK, Cat. #ab179445                           |
| c-Myc                     | Rabbit, monoclonal           | 1:1,000 (WB)                | Abcam, UK, Cat. #ab32072                            |
| p21                       | Rabbit, monoclonal           | 1:1,000 (WB)                | Abcam, UK, Cat. #ab109520                           |
| CDK2                      | Rabbit, monoclonal           | 1:1,000 (WB)                | Abcam, UK, Cat. #ab32147                            |
| CDK4                      | Rabbit, monoclonal           | 1:1,000 (WB)                | Abcam, UK, Cat. #ab108357                           |
| CDK6                      | Rabbit, monoclonal           | 1:1,000 (WB)                | Abcam, UK, Cat. #ab124821                           |
| CCNA1                     | Rabbit, monoclonal           | 1:1,000 (WB)                | Abcam, UK, Cat. #ab185619                           |
| CCNE1                     | Rabbit, monoclonal           | 1:1,000 (WB)                | Abcam, UK, Cat. #ab33911                            |
| E-cadherin                | Rabbit, monoclonal           | 1:500 (WB)                  | Cell Signaling Technology, USA, Cat. #3195          |
| N-cadherin                | Rabbit, monoclonal           | 1:500 (WB)                  | Cell Signaling Technology, USA, Cat. #13116         |
| $\beta$ -Catenin          | Rabbit, monoclonal           | 1:1,000 (WB)                | Cell Signaling Technology, USA, Cat. #8480          |
| MMP9                      | Rabbit, monoclonal           | 1:1,000 (WB)                | Cell Signaling Technology, USA, Cat. #13667         |
| Vimentin                  | Rabbit, monoclonal           | 1:1,000 (WB)                | Cell Signaling Technology, USA, Cat. #5741          |
| Snail                     | Rabbit, monoclonal           | 1:1,000 (WB)                | Cell Signaling Technology, USA, Cat. #3879          |
| Slug                      | Rabbit, monoclonal           | 1:1,000 (WB)                | Cell Signaling Technology, USA, Cat. #9585          |
| ATM                       | Rabbit, monoclonal           | 1:1,000 (WB)                | Abcam, UK, Cat. #ab32420                            |
| CHK2                      | Rabbit, monoclonal           | 1:5,000 (WB)                | Abcam, UK, Cat. #ab109413                           |
| ATM (pS1981)              | Rabbit, monoclonal           | 1:10,000 (WB)               | Abcam, UK, Cat. #ab81292                            |
| CHK2 (pT68)               | Rabbit, monoclonal           | 1:2,000 (WB)                | Abcam, UK, Cat. #ab32148                            |
| VHL                       | Rabbit, polyclonal           | 1:1,000 (WB)                | Cell Signaling Technology, USA, Cat. #68547         |
| c-Myc                     | Rabbit, polyclonal           | 1:50 (ChIP)                 | Cell Signaling Technology, USA, Cat. #9402          |
| Ki-67                     | Mouse, monoclonal            | 1:200 (IHC)                 | Cell Signaling Technology, USA, Cat. #9449          |
| Flag tag                  | Mouse, monoclonal            | 1:100 (IP)                  | Sigma, Cat. #F1804                                  |
| HA tag                    | Mouse, monoclonal            | 1:100 (IP)                  | OriGene, Cat. #TA180128                             |
| Anti-Mouse-IgG (H+L)-HRP  | Goat                         | 1:10,000 (WB)               | Jackson ImmunoResearch Inc, USA, Cat. #115-005-003  |
| Anti-Rabbit-IgG (H+L)-HRP | Goat                         | 1:10,000 (WB)               | Jackson ImmunoResearch Inc, USA, Cat. #111-005-003  |

**Supplementary Table S4. List of primers for PRR11 promoter.**

| <b>Primer number</b> | <b>Forward primer (5'-3')</b> | <b>Reverse primer (5'-3')</b> |
|----------------------|-------------------------------|-------------------------------|
| Primer 1             | TCAGCAACAAAGGTTGTGGT          | CATCTGAAAGCAGGATGCAC          |
| Primer 2             | CCCGAGTAGCTGGGACTACA          | TTGAGACTACCCTGGCCAAC          |
| Primer 3             | GGATGCCTTTCCTGTCTCAA          | GTGAGGGAAGAGGTGTGAGC          |
| Primer 4             | CATGGCAAAATCCCATCTCT          | ATCCTGCTTCAGCCTTTGA           |

# Full unedited gel for Figure 1

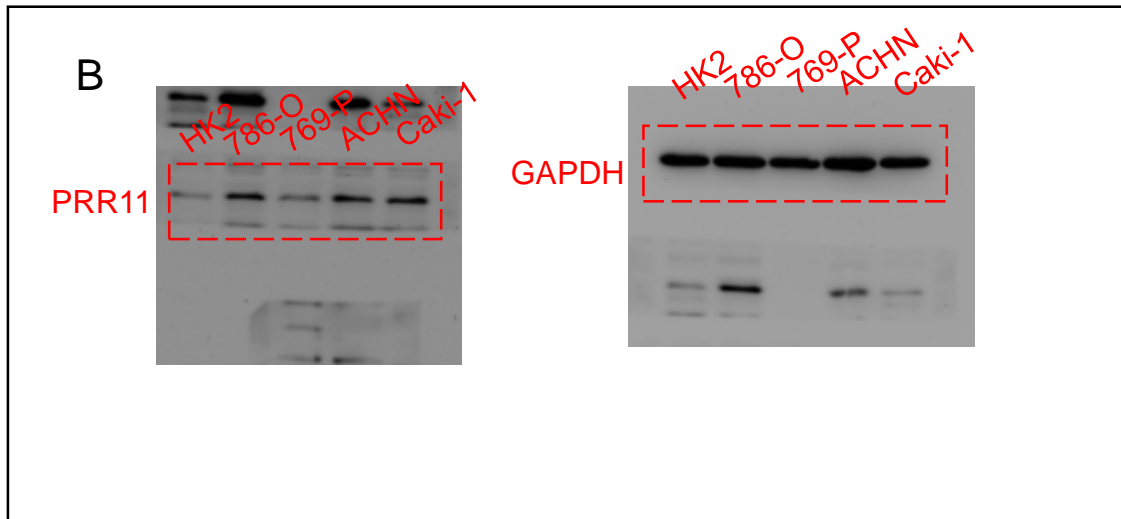



# Full unedited gel for Figure 3

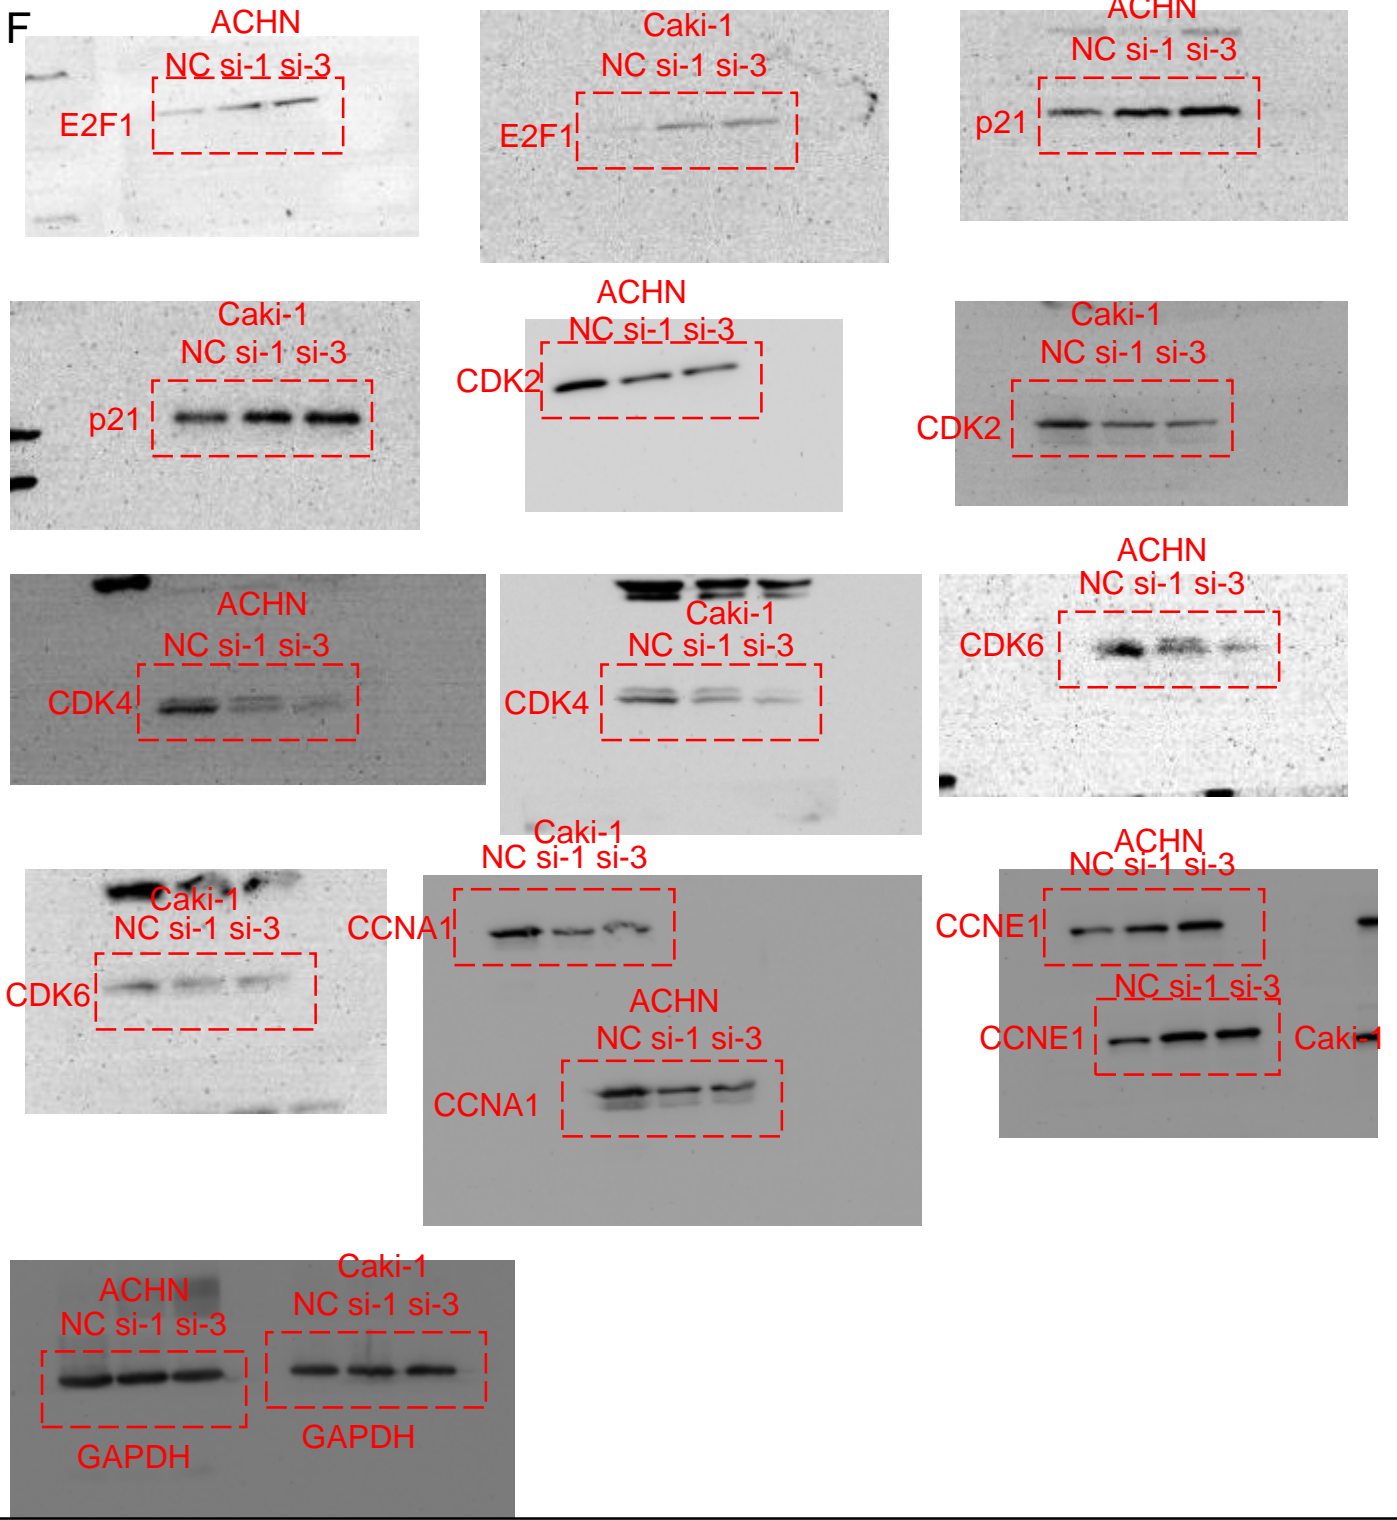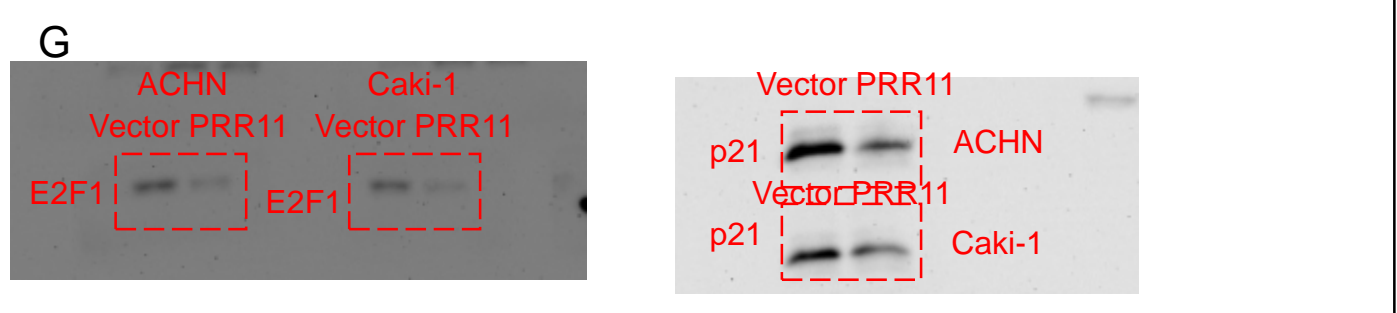

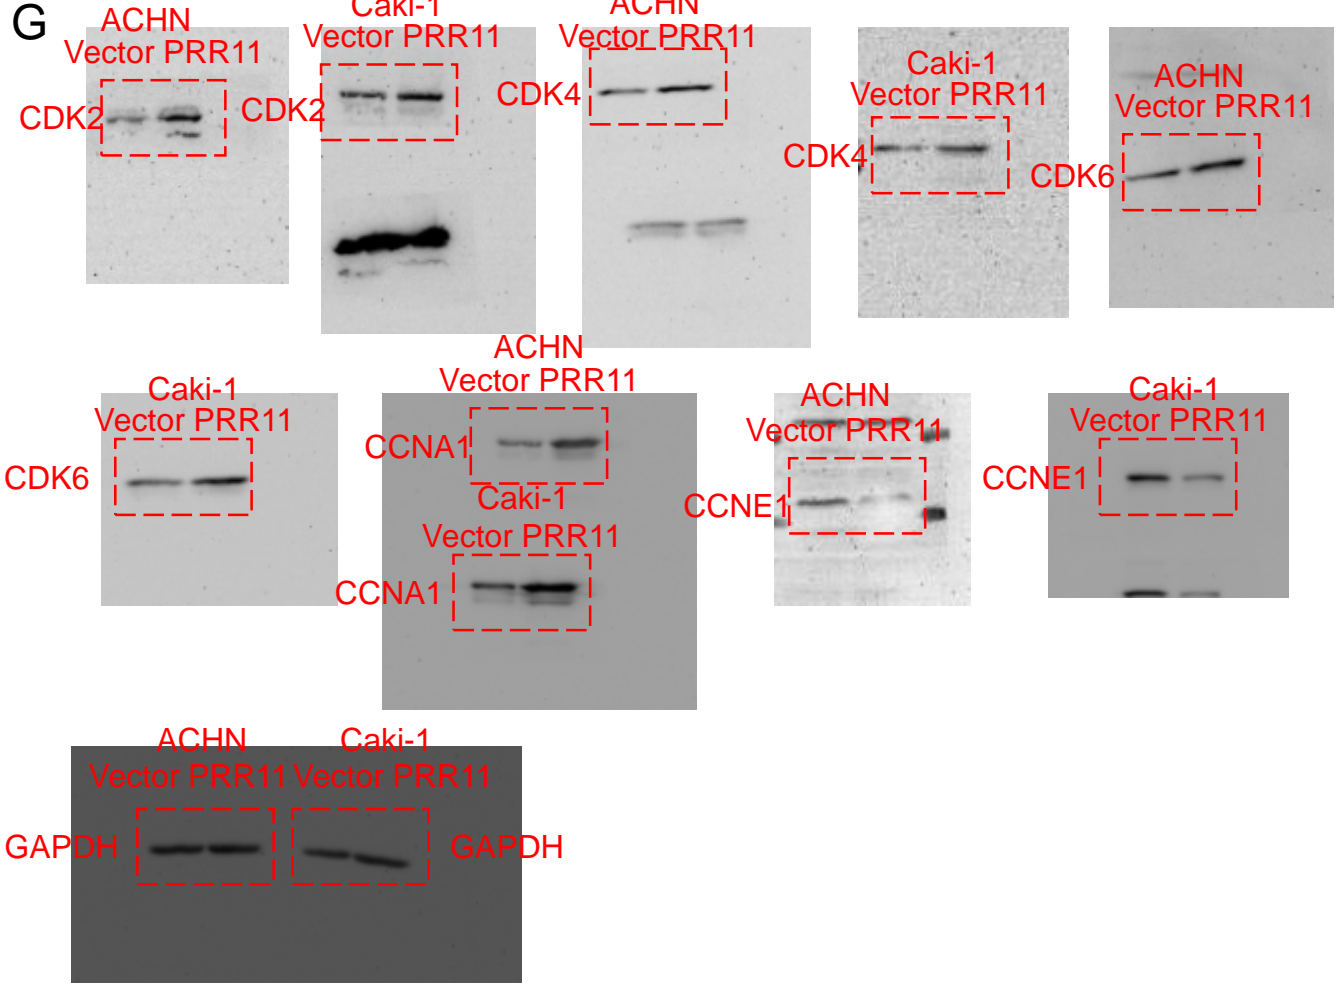

# Full unedited gel for Figure 4

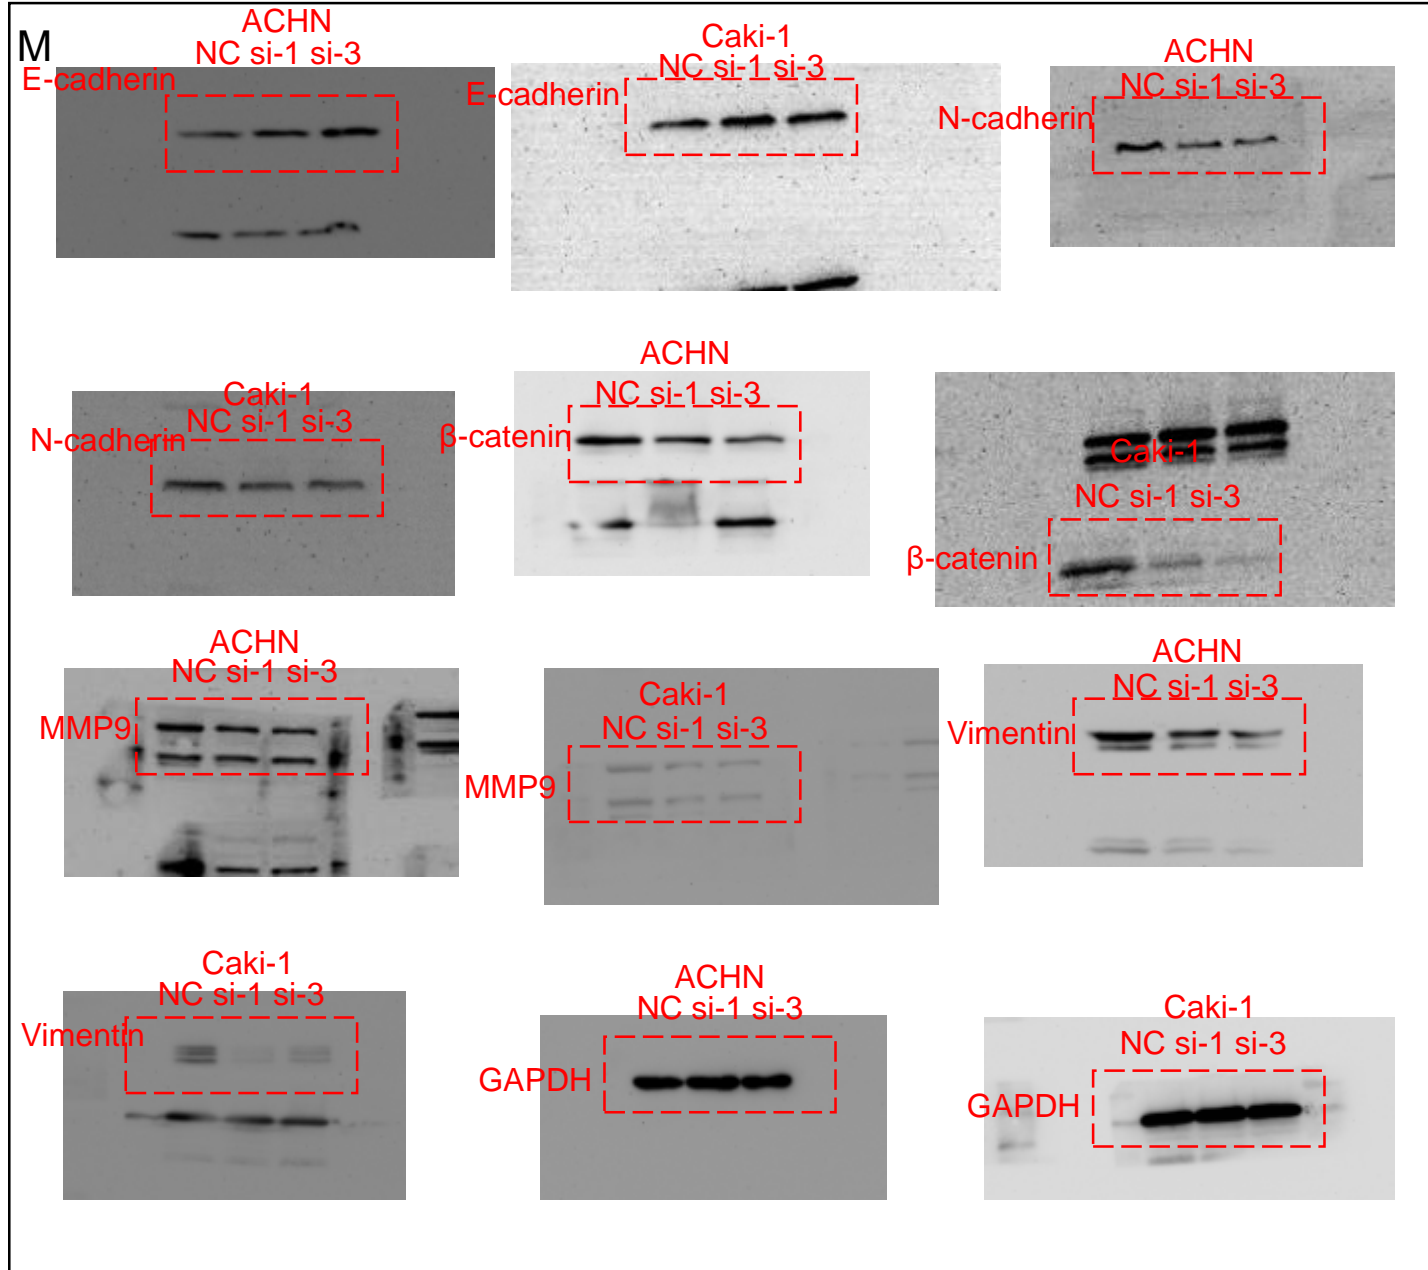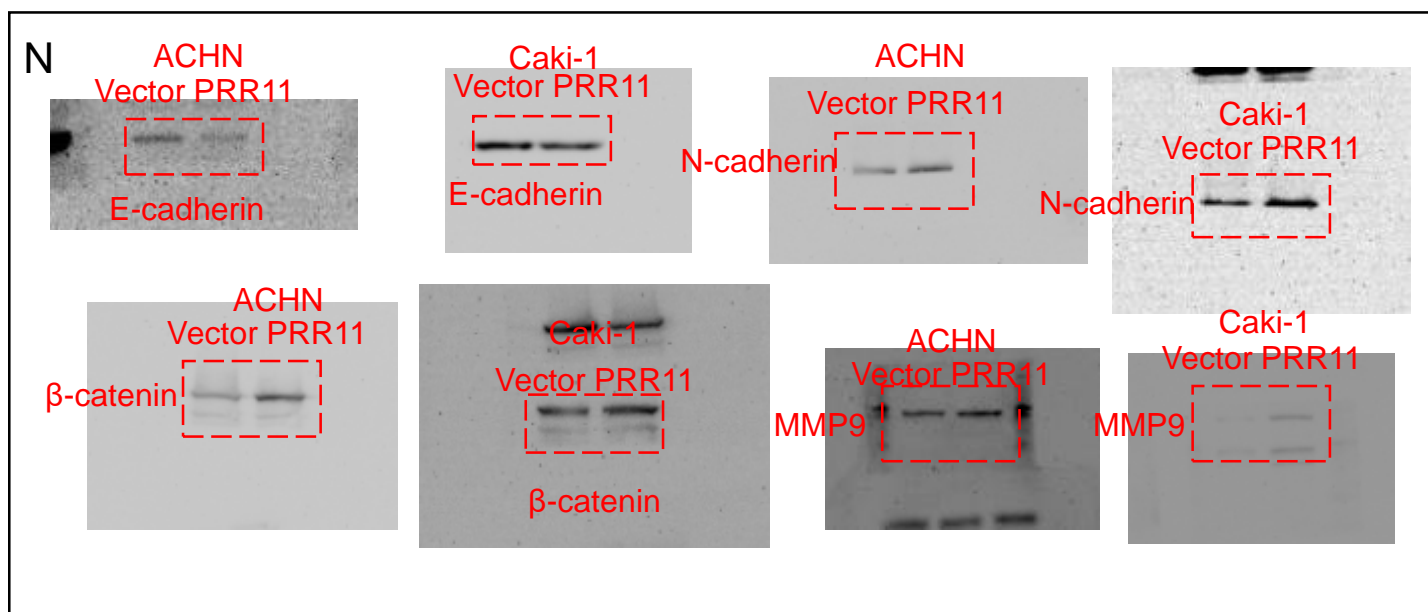

N

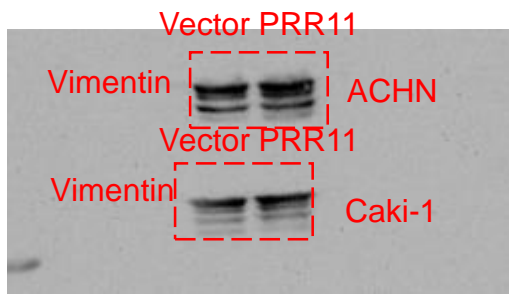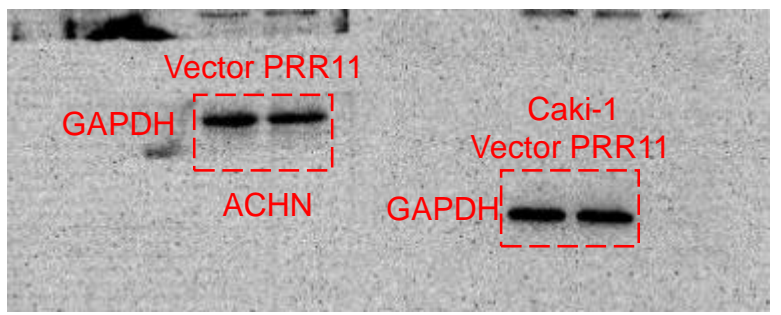

Full unedited gel for Figure 5

B

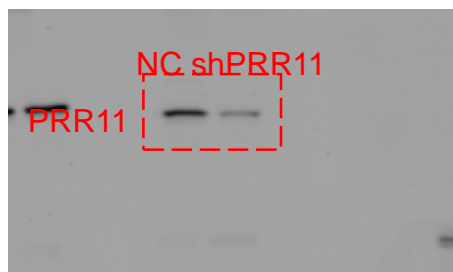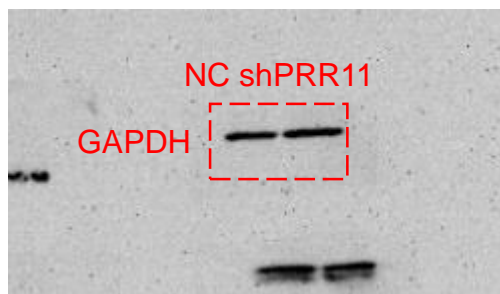

# Full unedited gel for Figure 6

D

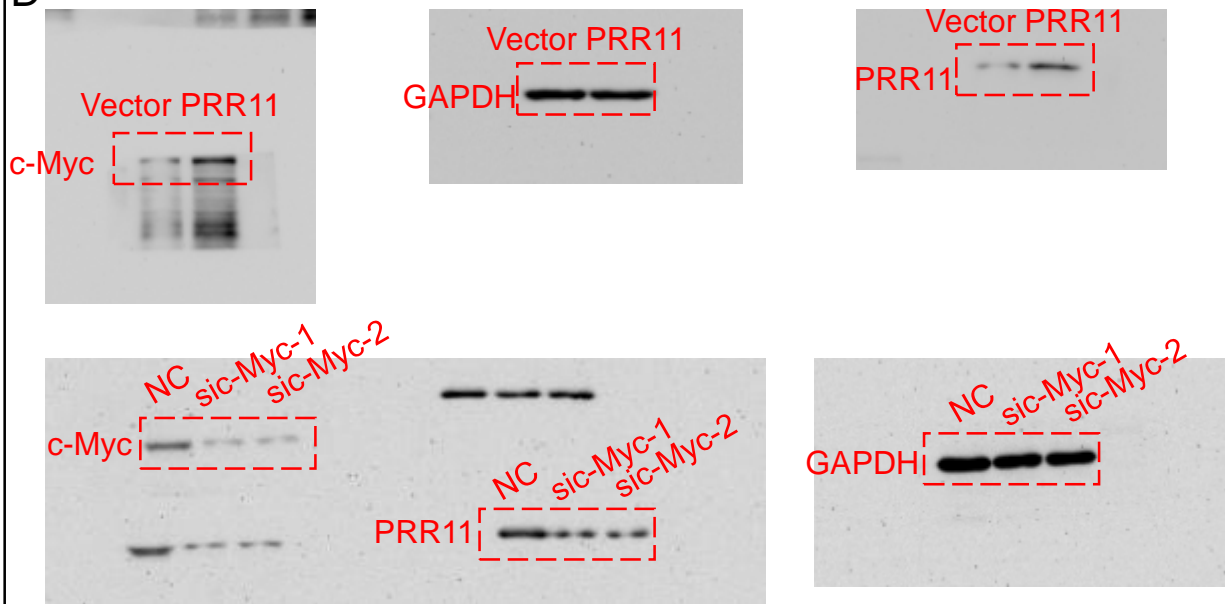

H

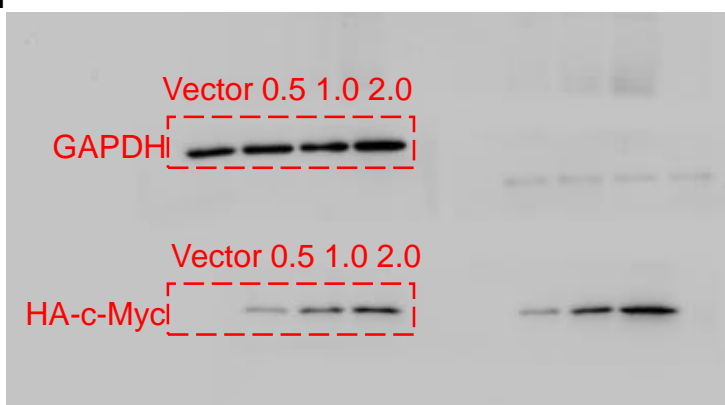

# Full unedited gel for Figure 7

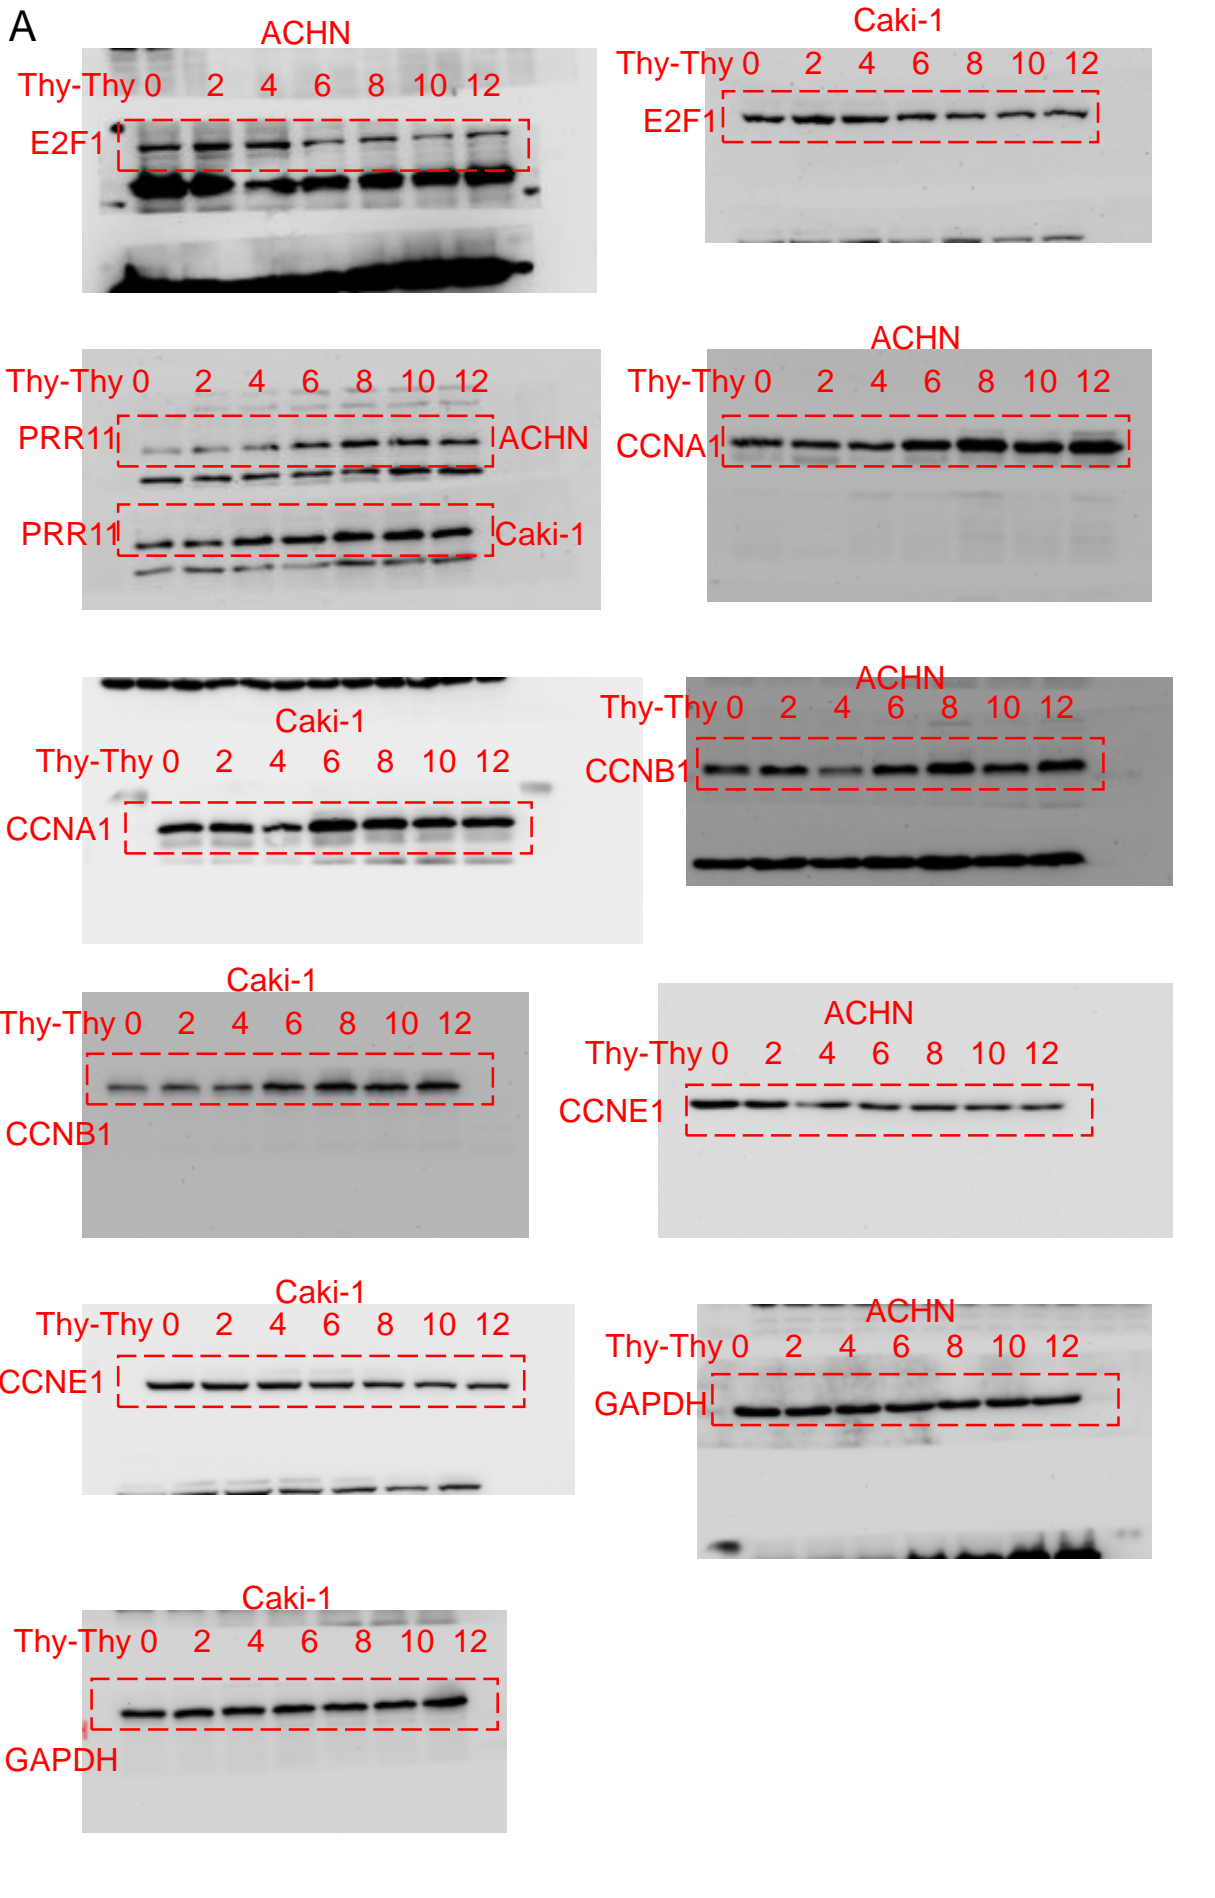

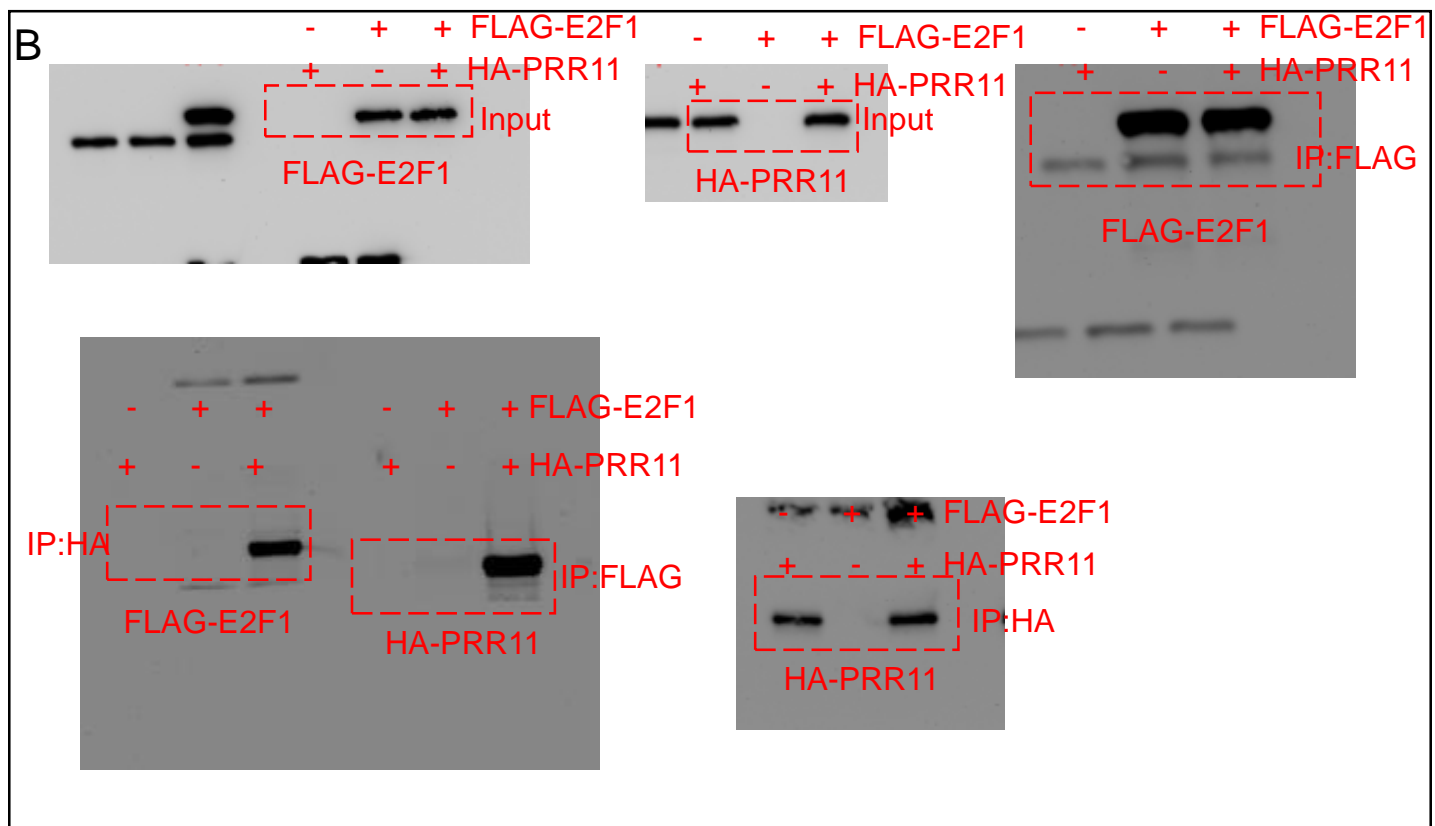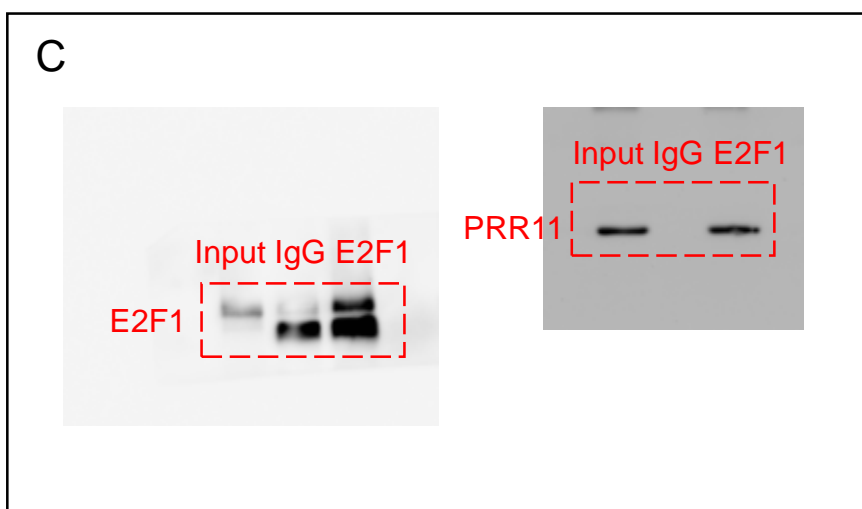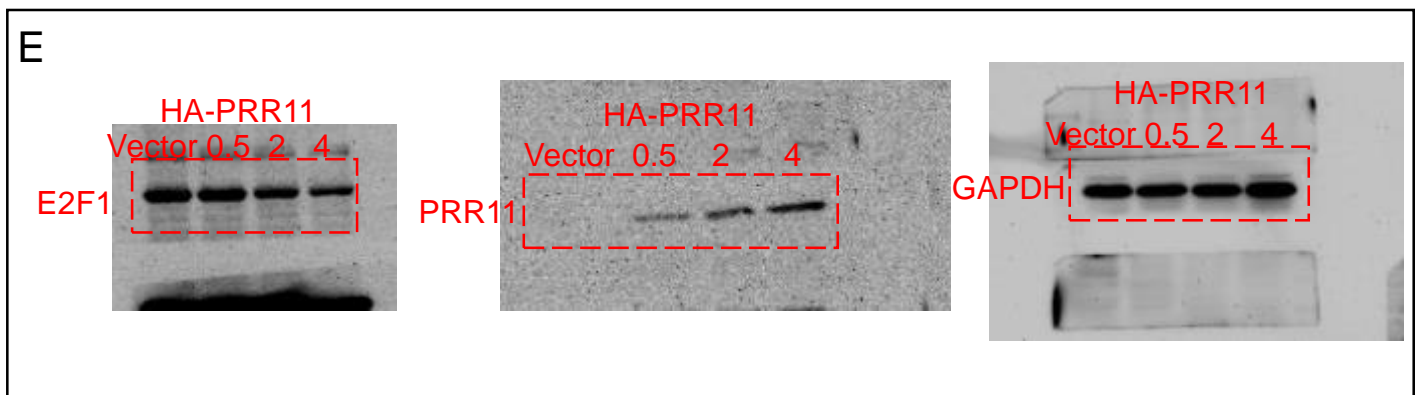



F-H

FLAG-E2F1

Vector

HA-PRR11

CHX(h) 0 4 8 12 0 4 8 12

FLAG-E2F1

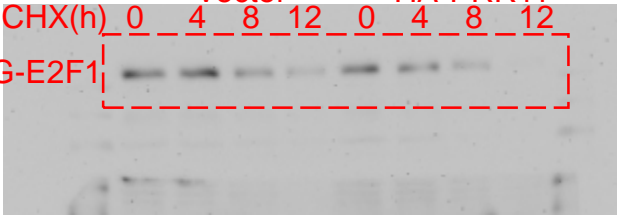

FLAG-E2F1

Vector

HA-PRR11

CHX(h) 0 4 8 12 0 4 8 12

GAPDH

HA-PRR11

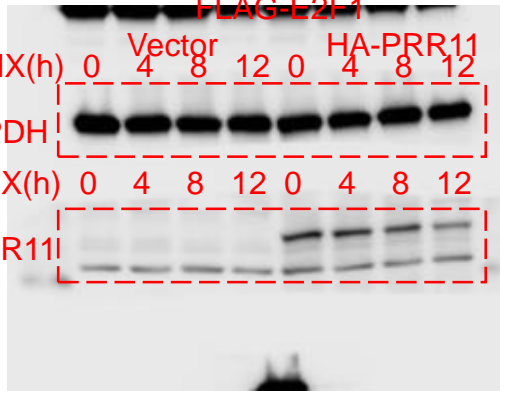

ACHN

NC

siPRR11-1

siPRR11-3

CHX(h) 0 4 8 12 0 4 8 12 0 4 8 12

E2F1

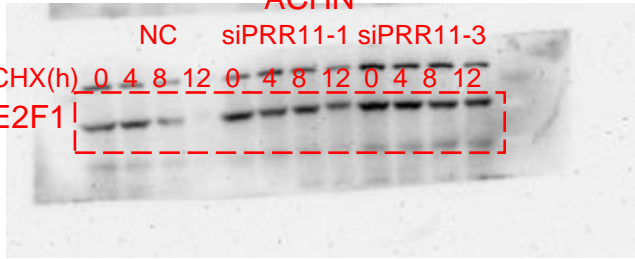

Caki-1

NC

siPRR11-1

siPRR11-3

CHX(h) 0 4 8 12 0 4 8 12 0 4 8 12

E2F1

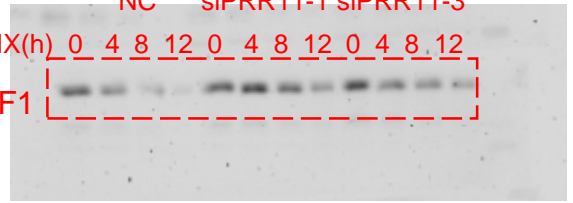

ACHN

NC

siPRR11-1

siPRR11-3

CHX(h) 0 4 8 12 0 4 8 12 0 4 8 12

PRR11

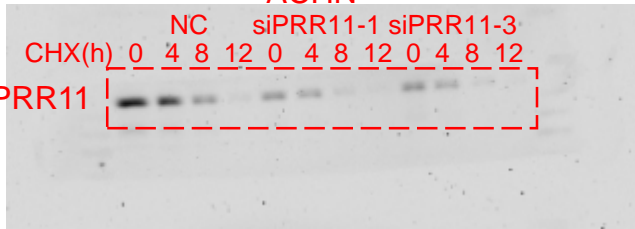

Caki-1

NC

siPRR11-1

siPRR11-3

CHX(h) 0 4 8 12 0 4 8 12 0 4 8 12

PRR11

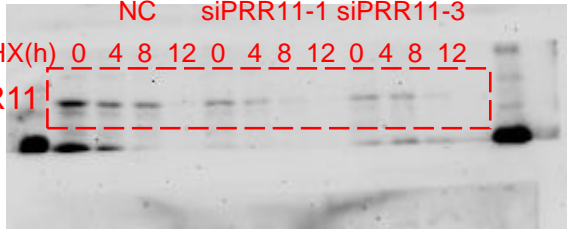

ACHN

NC

siPRR11-1

siPRR11-3

CHX(h) 0 4 8 12 0 4 8 12 0 4 8 12

GAPDH

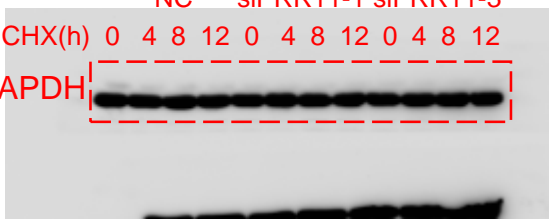

Caki-1

NC

siPRR11-1

siPRR11-3

CHX(h) 0 4 8 12 0 4 8 12 0 4 8 12

GAPDH

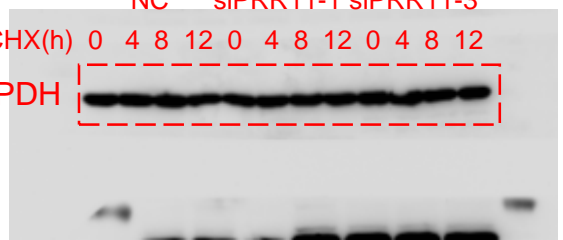

# Full unedited gel for Figure 8

**H**

shPRR11 - + + +  
 siE2F1-1 - - + -  
 siE2F1-2 - - - +

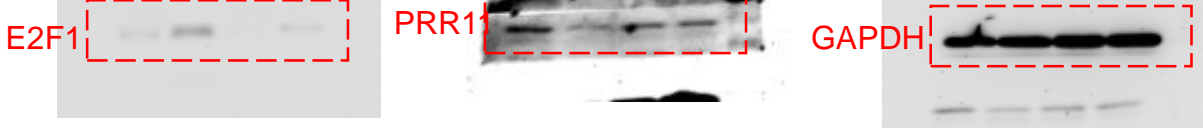

**I**

shPRR11 - + + +  
 siE2F1-1 - - + -  
 siE2F1-2 - - - +

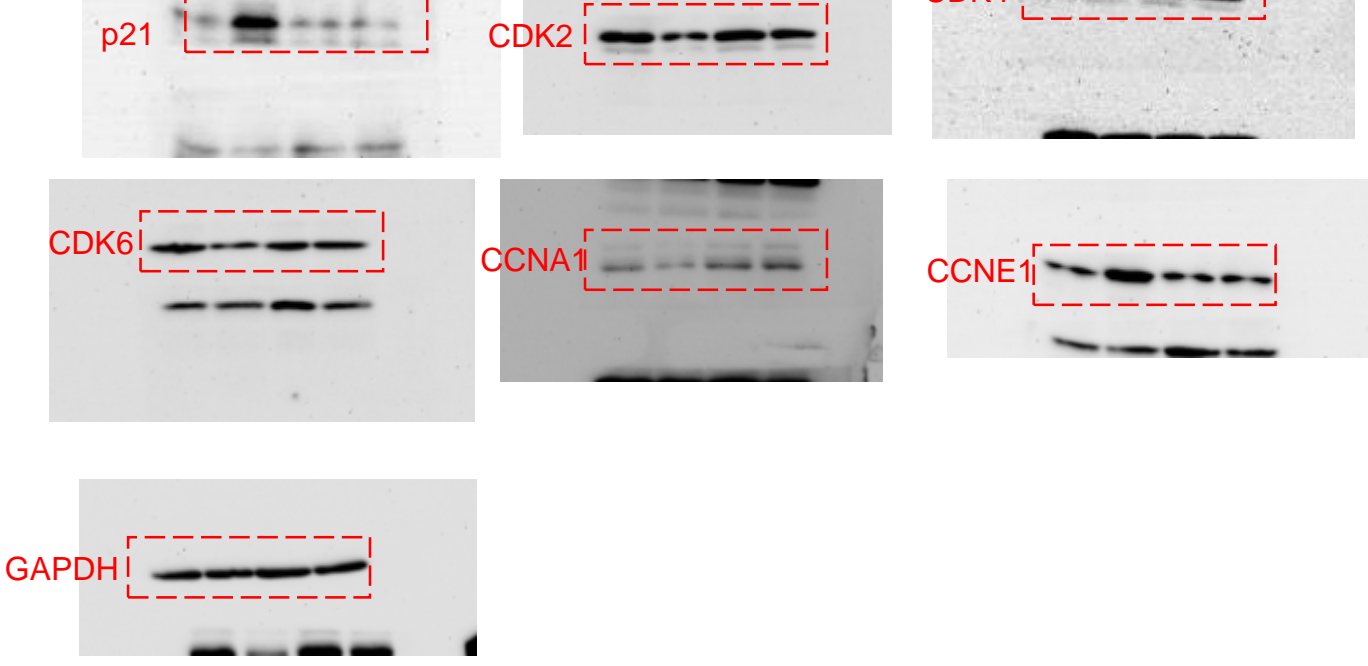

**J**

shPRR11 - + + +  
 siE2F1-1 - - + -  
 siE2F1-2 - - - +

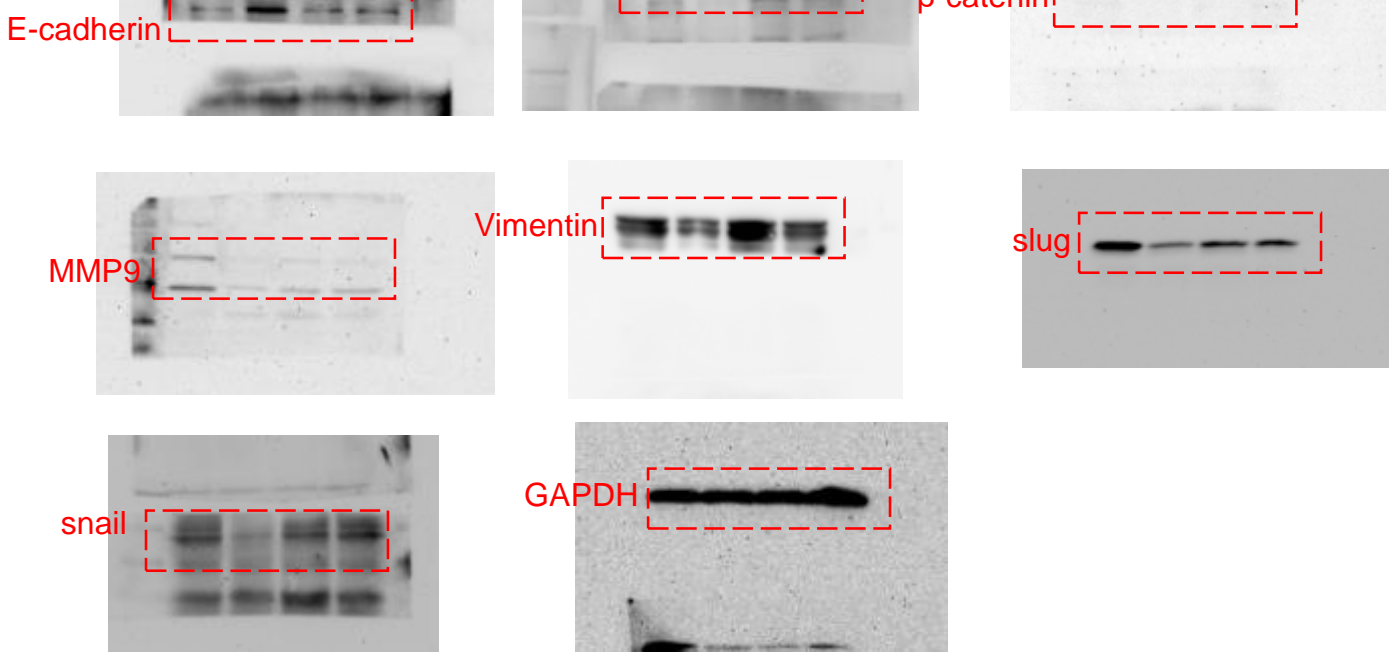

Full unedited gel for Supplementary Figure 5

C

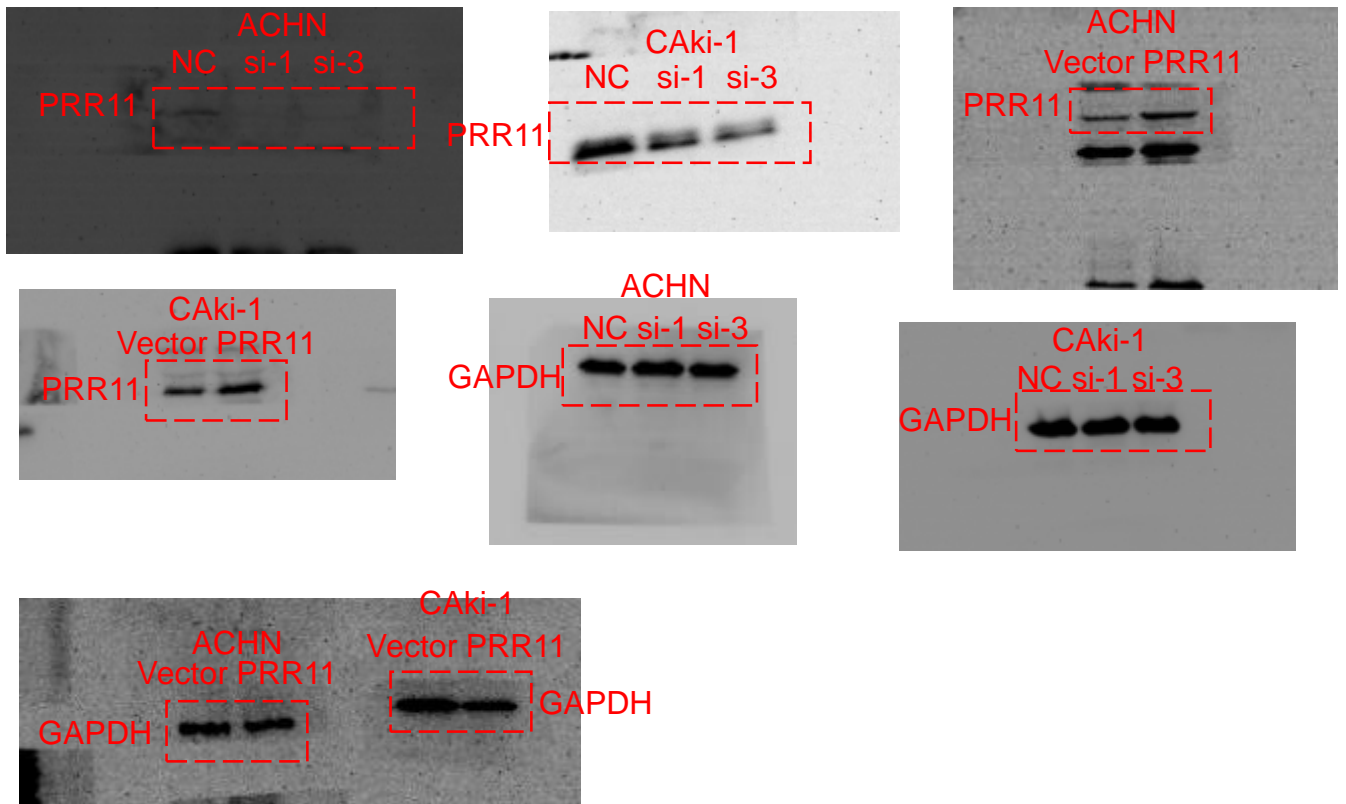

# Full unedited gel for Supplementary Figure 7

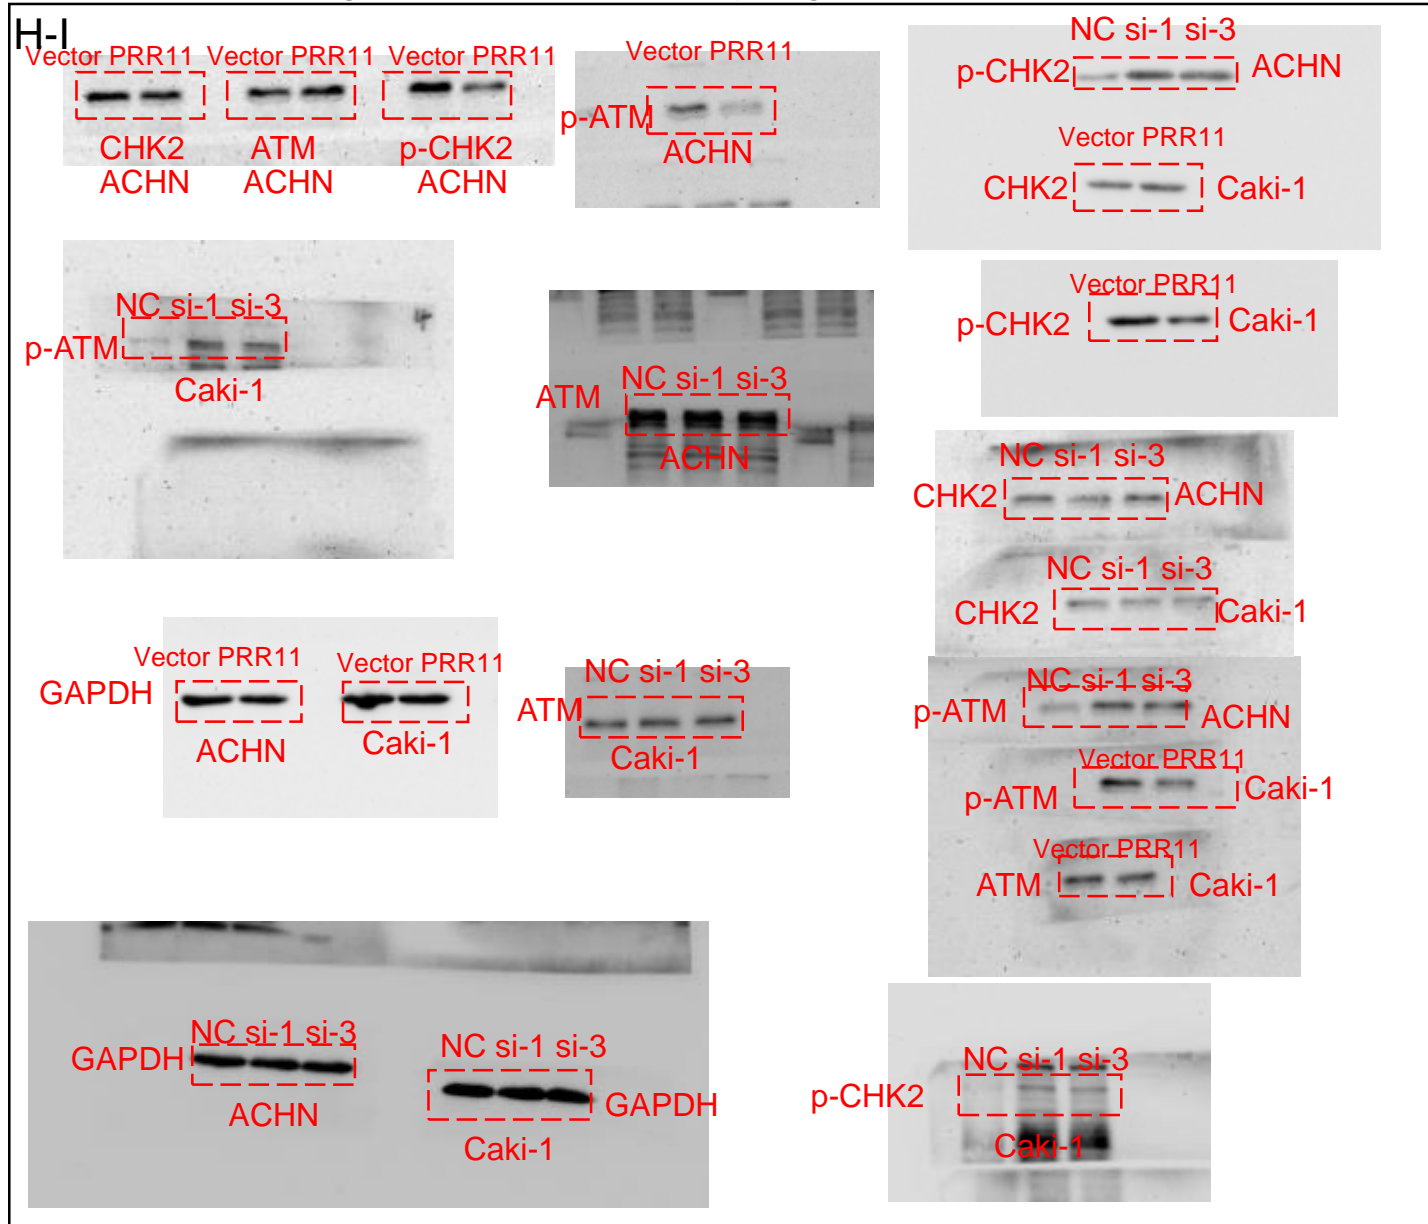

Full unedited gel for Supplementary Figure 8

B

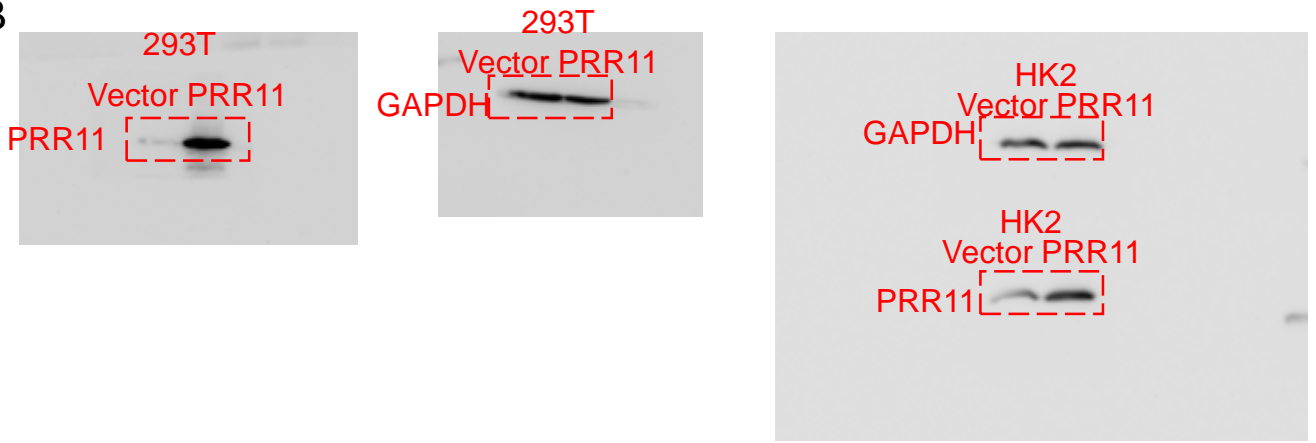

# Full unedited gel for Supplementary Figure 11

F

|          |                               |   |   |   |
|----------|-------------------------------|---|---|---|
| shPRR11  | -                             | + | + | + |
| siE2F1-1 | -                             | - | + | - |
| siE2F1-2 | -                             | - | - | + |
| ATM      | [Red dashed box around bands] |   |   |   |

p-ATM [Red dashed box around bands]

p-CHK2 [Red dashed box around bands]

CHK2 [Red dashed box around bands]

GAPDH [Red dashed box around bands]

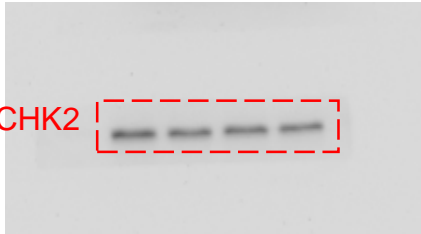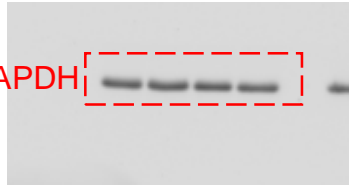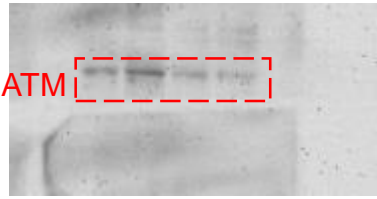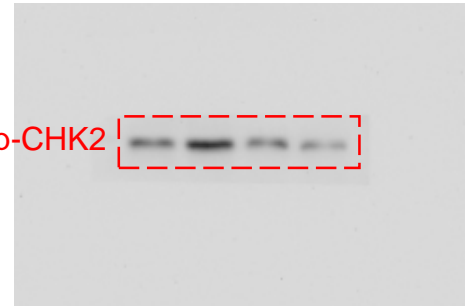

Supplement: jciinsight-6-145172-s315.pdf [file jciinsight-6-145172-s315.pdf]
